26 immune activation. Further, using a HFD we induced gut microbial dysbiosis in double hu-mice which  
27 corresponded with increased systemic immune activation and inflammation.

28

## 29 **Conclusions**

30 Here, we describe the changes in the human gut microbiome and human immune system due to HIV-1  
31 infection or HFD using our double hu-mice model. HIV-1 infection led to changes in the composition of  
32 the human-like gut microbiome that was associated with human CD4 T cell loss and high levels of  
33 inflammation and immune activation. The HFD quickly changed the composition of the gut microbiome  
34 and led to systemic immune activation and inflammation. We further identified a subset of gut bacteria in  
35 HIV-1 infected and HFD fed double hu-mice that was closely associated with systemic inflammation and  
36 immune activation. This study demonstrated how double humanized mice can be used to study the  
37 complex in vivo interactions of the gut microbiome and human immune system in the context of both  
38 disease and diet.

39

## 40 **Background**

41 The human gut is home to the largest number of immune cells in the body and provides an  
42 ecosystem for trillions of microbes known collectively as the gut microbiome [1, 2]. The gut microbiome  
43 and corresponding gut immune system have a highly reciprocal and dynamic relationship that is a critical  
44 determinant for human health and disease [3-7]. While the gut microbiome influences host immune  
45 responses through their antigens and metabolites, the immune system in turn contributes to shaping the  
46 composition and distribution of gut microbes [8-10]. It has been estimated that up to 10% of immune  
47 response variability is associated with the gut microbiome [11]. The gut microbiome has also been shown  
48 to be essential for proper immune development, immune function, and response to infection and  
49 vaccination.

50 The gut plays a key role in the pathogenesis of human immunodeficiency virus type-1 (HIV-1)  
51 infection. One of major features of HIV-1 infection is the rapid and extensive loss of gut immune cells,

52 most notably CD4+ T cells [12-17]. The depletion of gut immune cells is accompanied by alterations in  
53 the gut microbiota, the interruption of gut epithelial barrier integrity with subsequent microbial  
54 translocation, and increased inflammation and immune activation [18-25]. In addition, the alterations of  
55 the gut microbiome and gut immune cells may increase the susceptibility to rectal HIV-1 transmission, as  
56 previous studies have shown that local and systemic inflammation will activate and attract CD4+ T cells  
57 thereby increasing the risk of HIV-1 mucosal transmission [26]. Further, gut microbial dysbiosis and  
58 microbial translocation have been implicated in the incomplete gut immune reconstitution and increased  
59 systemic immune activation and inflammation in people living with HIV (PLH) on suppressive anti-  
60 retroviral therapy (ART) [21, 25, 27-29]. Despite the ability of ART to suppress HIV-1 replication to  
61 undetectable levels in peripheral blood, gut immune reconstitution following ART is often slow and  
62 incomplete [30-35]. Additionally, there are persistently increased levels of inflammation and immune  
63 activation [36-38] that contribute to increased comorbidities in PLH [39-41], of which gut microbial  
64 translocation mediated immune activation is thought to be a major contributing factor [42, 43].  
65 Consequently, in the ART era, the life expectancy of HIV-1 infected individuals in developed countries is  
66 over 10-years shorter than a normal lifespan [44] and non-infectious morbidities are also significantly  
67 higher than the general population [45]. Given the importance of the gut to almost all aspects of  
68 prevention, pathogenesis, and treatment of HIV-1, investigating the in vivo relationship between the gut  
69 microbiome and human immune system may provide novel insights for prevention and treatment  
70 strategies. Due to the bidirectional relationship of the gut microbiome and the immune system, resolving  
71 gut microbial dysbiosis may also improve immune cell recovery, reduce immune activation and  
72 inflammation during ART treatment, and ultimately reduce comorbidities.

73         Despite the significant progress that has been made in understanding HIV-1 pathogenesis and in  
74 treating HIV-1 infection, a key knowledge gap remains in our mechanistic understanding of the impact of  
75 the gut microbiome on immune activation and inflammation during HIV-1 infection. Research utilizing  
76 animal models has provided a large portion of our understanding of the connection between the gut  
77 microbiome and human disease, of which humanized mice (hu-mice), that feature an engrafted human

78 immune system, are an important pre-clinical animal model for translational biomedical research [46-54].  
79 However, the gut murine microbiome significantly differs from humans due to anatomical, evolutionary,  
80 environmental, and diet differences [55, 56]. To improve the translatability of hu-mice research, we  
81 previously developed double hu-mice that feature a stable human-like gut microbiome and human  
82 immune system [57, 58]. In this study, we used this model and investigated the immunopathogenesis of  
83 alterations in the gut microbiome induced by HIV-1 infection and a high-fat diet (HFD). We found that  
84 HIV-1 infection led to changes in the composition of the human-like gut microbiome that temporally  
85 corresponded with human CD4+ T cell loss and high levels of inflammation and immune cell activation.  
86 We also showed that a HFD quickly changed the composition of the gut microbiome and led to systemic  
87 immune activation and inflammation. Importantly, this study demonstrated the double hu-mice model can  
88 be used to study the complex in vivo interactions of the gut microbiome and human immune system in the  
89 context of human health and disease.

90

## 91 **Results**

### 92 **HIV-1 infection altered the gut microbiome of hu-BLT mice**

93 The hu-BLT mice (hu-mice) model allows for a high level of human immune cell reconstitution  
94 and has been used for the study of HIV-1 prevention, pathogenesis, and treatment [59-62]. However, the  
95 hu-mice gut microbiome is of murine origin and we previously demonstrated that hu-mice harbored a  
96 distinct low diversity gut microbiome [63]. To investigate the extent to which HIV-1 infection impacts  
97 the murine gut microbiome in this model, we compared longitudinally sampled gut microbiome profiles  
98 of HIV-1 infected hu-mice and uninfected hu-mice. Twenty-four fecal samples from 4 HIV-1 infected hu-  
99 mice were collected longitudinally for up to 6 consecutive weeks. The HIV-1 infected hu-mice had an  
100 altered gut microbiome composition compared to uninfected hu-mice and the two groups clustered  
101 distinctly from one another in both Non-metric Multi-dimensional Scaling (NMDS) and Principal  
102 Coordinates Analysis (PCoA) plots (Supplemental Figure HIV\_HuMice.pdf). Additionally, HIV-1  
103 infected hu-mice had higher measures of alpha diversity, including the number of unique species per

104 sample or species richness, Simpson’s Diversity Index, and Shannon Diversity Index (Supplemental  
 105 Figure HIV\_HuMice.pdf). There were multiple alterations in the gut microbiome composition of the  
 106 HIV-1 infected hu-mice as shown by heatmaps of bacterial relative abundance for Order and Family taxa  
 107 levels (Supplemental Figure HIV\_HuMice.pdf). Significant differences in the relative abundance of gut  
 108 bacterial taxa were found using Kruskal-Wallis tests with false discovery rate (FDR) adjusted P values  
 109 <.05 (Supplemental File HIV\_HuMice\_KW.xlsx). Nevertheless, due to the large compositional  
 110 differences between the murine and human gut microbiomes, regular hu-mice without a humanized gut  
 111 microbiome may limit their translatability for the study of human health and disease [55, 56].

112

113 **Table 1. Summary of experimental hu-mice cohorts**

114

| Cohort                      | Double hu-mice | Number of mice | Number of fecal samples | Condition     | Maximum weeks collected  |
|-----------------------------|----------------|----------------|-------------------------|---------------|--------------------------|
| Pre-FMT                     | No             | 40             | 40                      | NA            | 115<br>116<br>117<br>118 |
| Post-FMT                    | Yes            | 32             | 31                      | NA            | 119<br>120               |
| HIV infected double hu-mice | Yes            | 14             | 90                      | HIV-1         | 121<br>122               |
| HFD                         | Yes            | 8              | 34                      | High fat diet | 123<br>124               |
| LFD                         | Yes            | 8              | 39                      | Low fat diet  | 125<br>126               |

127

128 **HIV-1 infection altered the gut microbiomes of double humanized BLT mice**

129 We previously developed a double hu-mice model that harbors a stable human-like gut  
130 microbiome in addition to a functional human immune system [58, 63]. To create double hu-mice, we  
131 first performed surgery on NSG mice to create hu-BLT mice with an engrafted human immune system.  
132 Hu-mice were subsequently treated with a cocktail of broad-spectrum antibiotics to reduce murine gut  
133 bacteria, followed by human fecal material transplants (FMT) using fecal material from a mixture of three  
134 healthy human donors. This double hu-mice model was used to determine if and how the composition of  
135 the gut microbiome was altered during HIV-1 infection (Table 1). Gut microbiome profiles of the mice  
136 were sampled at 10 weeks post BLT humanization surgery and before antibiotic treatment and FMTs  
137 (Pre-FMT) as well as one week following the completion of antibiotic treatment and FMTs (Post-FMT).

138 After collecting the Post-FMT fecal samples, double hu-mice were intraperitoneally injected with  
139  $4.5 \times 10^5$  TCID of an equal mixture of HIV-1<sub>SUMA</sub> and HIV-1<sub>JRC5F</sub>. To determine the longitudinal changes  
140 to the gut microbiomes of HIV-1 infected double hu-mice, fecal samples were collected every week for  
141 up to 12 weeks from 11 infected double hu-mice (Infected) and 3 uninfected double hu-mice  
142 (Uninfected). As shown in Figure 1AB, HIV-1 infection altered the composition of the gut microbiome  
143 over the course of the study. Additionally, sample collection date (Figure 1CD) and body weight (Figure  
144 1 EF) were associated with the composition changes observed in the gut microbiome.

145 Double hu-mice from both the Infected and Uninfected group had altered gut microbiome profiles  
146 compared to Post-FMT samples (Figure 2AB). Both infected and uninfected double hu-mice had slightly  
147 higher measures of alpha diversity compared to Pre-FMT and Post-FMT samples, including the number  
148 of unique species per sample or species richness, Simpson's Diversity Index, and Shannon Diversity  
149 Index (Figure 2CDE). Infected samples had slightly higher alpha diversity measures compared to  
150 uninfected samples, but the differences were not significant. Differences in relative abundance for the  
151 experimental groups are shown by Order and Family taxa levels (Figure 2FG). Significant differences in  
152 the relative abundance of gut bacterial taxa between the double hu-mice from the Infected group and  
153 Uninfected group were found using Kruskal-Wallis tests with false discovery rate (FDR) adjusted P  
154 values  $< .05$  (Supplemental File HIV\_KW.xlsx). Infected double hu-mice had a higher relative abundance

155 of *Bifidobacteriaceae* (7.09%, P=0.0001 FDR) and *Ruminococcaceae* (4.47%, P=0.0005 FDR) and a  
156 lower abundance of *Lactobacillaceae* (-15.67%, P=0.0001 FDR) and *Turicibacteraceae* (-3.99%,  
157 P=0.0302 FDR) (Supplemental File HIV\_Composition.pdf).

158 To determine the changes in the gut microbiome of double hu-mice before and after HIV-1  
159 infection, we compared infected samples with Post-FMT samples (Supplemental File HIV\_KW.xlsx).  
160 After infection, double hu-mice had a lower relative abundance of *Erysipelotrichaceae* (-6.18%,  
161 P=0.0001 FDR), *Lachnospiraceae* (-4.96%, P=0.0051 FDR), and *Verricomicrobiaceae* (-11.82%,  
162 P=0.0001 FDR) and a higher relative abundance of *Bacteroidaceae* (4.52%, P=0.0424 FDR),  
163 *Bifidobacteriaceae* (4.43%, P=0.0404 FDR), *Clostridiaceae* (2.48%, P=0.0001 FDR), *Rikenellaceae*  
164 (1.63%, P=0.0001 FDR), and *Ruminococcaceae* (8.64%, P=0.0001 FDR).

165 A random forest model was trained to predict if the gut microbiome profiles came from double  
166 hu-mice that were HIV-1 infected or uninfected based on the amplicon sequence variant (ASV) features.  
167 The top 15 most important discriminatory features of the model based on area under the ROC curve were  
168 then identified. These features were scaled to 100 and plotted along with the average normalized ASV  
169 counts for each group (Supplemental File HIV\_Importance.pdf). The top ranked features were ASV527  
170 *Ruminococcus* and ASV321 *Dorea*, both of which were more prevalent in infected double hu-mice. Of  
171 the top 15 features, many ASVs were more prevalent in HIV-1 infected mice including ASVs from  
172 *Butyricoccus pullicaecorum*, *Ruminococcaceae*, *Ruminococcus*, *Oscillospira*, and *Christensenellaceae*.  
173 Three ASVs were more prevalent in uninfected double hu-mice including ASVs from *Butyricoccus*  
174 *pullicaecorum*, *Blautia producta*, and *Lachnospiraceae*. Here we show there are many features of the gut  
175 microbiome that were different between infected and uninfected double hu-mice. To further evaluate the  
176 role of gut microbiome during HIV-1 infection we determined the inflammatory and immune profiles  
177 from these double hu-mice.

178

179 **HIV-1 infection of double hu-mice led to increased systemic inflammation and immune activation**

180 To evaluate systemic inflammation and immune activation in HIV-1 infected and uninfected  
181 double hu-mice, we measured plasma proinflammatory cytokines using multiplex immunoassays and  
182 human T cell activation in peripheral blood and splenic tissues using flow cytometry. Infected double hu-  
183 mice had significantly higher levels of IL-1 $\beta$ , IL-6, IFN- $\gamma$ , and TNF- $\alpha$  (Figure 3) at 12 weeks post infection  
184 (WPI), whereas, cytokine levels from samples collected at 7 (WPI) were not elevated compared to  
185 uninfected samples. CD4 T cell depletion is the pathogenic hallmark of HIV-1 infection. HIV-1 infection  
186 leading to CD4 T cell death can be observed in peripheral blood of infected hu-mice beginning at 2-3  
187 WPI [64]. Using flow cytometry, we tracked peripheral blood CD4 T cell levels in infected and  
188 uninfected double hu-mice (Figure 4AB). There was a decline in CD4 T cells in all post infection  
189 samples, of which some infected double hu-mice declined to levels below 50% of parent gated CD3 T  
190 cells. We also measured markers of immune activation in peripheral blood human T cells. All three  
191 populations of activated CD8 T cells, including CD8+ CD38+, CD8+ CD69+, and CD8+ HLA-DR+ T  
192 cells, were increased as a result of infection. CD4+ HLA-DR+ populations were also increased after  
193 infection, while the CD4+ CD69+ population had no significant changes. CD4+ CD38+ populations  
194 decreased after infection, which may be due to increased cell death in this population of activated CD4+  
195 T cells.

196 During HIV-1 infection the level of CD4 T cell death and immune activation can differ between  
197 peripheral blood and lymphoid tissues. Therefore, 4 double hu-mice were sacrificed at both 7 WPI and 12  
198 WPI. Flow cytometry was performed on lymphocytes isolated from spleen tissue (Supplemental Figure  
199 HIV\_Spleen.pdf). The CD4 T cell loss was more severe in the spleen as compared to peripheral blood.  
200 There did not appear to be any major changes in CD4+ CD38+ population, while CD4+ CD69+ and  
201 CD4+ HLA-DR+ populations were increased in some of the infected animals. Almost all of the Infected  
202 samples had higher proportions of immune activated CD8 T cells, including CD8+ CD38+, CD8+  
203 CD69+, and CD8+ HLA-DR+ populations. The double hu-mice model of HIV-1 infection recapitulates



204 many important aspects of HIV-1 pathogenesis, including CD4 T cell loss and increased systemic  
205 inflammation and immune activation in the context of a human gut microbiome.

206

### 207 **Gut microbial dysbiosis was established in the double hu-mice model with a high-fat diet**

208 The establishment of gut microbial dysbiosis in the double hu-mice model is needed for the  
209 investigation into the role of the gut microbiome in HIV-1 rectal transmission susceptibility and the study  
210 of the increased risk of comorbidities in HIV-1 infected individual on antiretroviral therapy. Previous  
211 studies have shown that local and systemic inflammation, along with the availability and activation state  
212 of target cells, are the major factors in determining the risk for HIV-1 transmission [26]. Studies on  
213 vaginal HIV-1 transmission demonstrated that the mucosal microbiome plays an important role in  
214 determining HIV-1 susceptibility [65-67]. Previous studies showed that feeding mice a high-fat diet  
215 (HFD) resulted in microbial dysbiosis, disruption of the gut epithelial barrier, increased systemic  
216 inflammation, and higher numbers of activated immune cells [68, 69]. Therefore, we fed double hu-mice  
217 with a HFD and found that it changed the engrafted healthy human gut microbiome into a state of  
218 microbial dysbiosis. The HFD group (N=8) was fed a diet consisting of 60% kcal from fat with 275 kcal  
219 of added sucrose (D12492, Research Diets Inc.). The low-fat diet (LFD) group (N=8) was fed a matched  
220 calorie control diet with 10% kcal from fat and no added sucrose (D12450K, Research Diets Inc.). Using  
221 this experimental design, we determined the impacts of these different diets on the gut microbiome as  
222 well as systemic inflammation and immune activation (Table 1). Before the introduction of a HFD or  
223 LFD, double hu-mice were fed regular mouse chow containing at least 14% protein (Teklad 2914). Fecal  
224 samples were collected for up to 9 weeks post new diet introduction.

225 The HFD group quickly showed drastic changes in gut microbiome composition as compared to  
226 Post-FMT samples of double hu-mice fed with regular mouse chow and double hu-mice fed with a LFD  
227 (Figure 5AB). The microbiome profiles from fecal samples collected from HFD and LFD fed groups  
228 clustered separately from the regular mouse chow Post-FMT samples based on principal component 1  
229 (PC1). Further, the microbiome profiles from fecal samples collected from the HFD and LFD fed groups

230 clustered separately from one another based on principal component 2 (PC2). After Pre-FMT and human  
231 donor samples were added to the analysis, the HFD and LFD samples clustered distinctly from the regular  
232 mouse chow Post-FMT samples (Supplemental Figure Diet\_Comp.pdf). In the PCoA plot, PC1 represent  
233 the differences observed between the pre-existing murine gut microbiome in the Pre-FMT samples  
234 compared to the human-like gut microbiomes in double hu-mice and human donor samples. PC2 shows  
235 the differences between the regular mouse chow Post-FMT samples compared to the HFD and LFD  
236 samples.

237         The introduction of a HFD to the double hu-mice decreased measures of alpha diversity,  
238 including the number of unique species per sample or species richness, Simpson's Diversity Index, and  
239 Shannon Diversity Index (Figure 5CDE). We also observed a smaller decrease in species richness in the  
240 double hu-mice fed with a LFD compared to the Post-FMT samples from double hu-mice fed with regular  
241 mouse chow. However, the HFD fed double hu-mice had the lowest species richness and the double hu-  
242 mice fed with a LFD did not have decreased Simpson's Diversity Index or Shannon Diversity Index  
243 compared to the Post-FMT fecal samples from the double hu-mice fed with a regular mouse chow.

244         When Pre-FMT and human donor fecal sample data was added to the analysis, the Pre-FMT  
245 samples had pre-existing low diversity measurements (Supplemental Figure Diet\_Comp.pdf). After  
246 antibiotic treatment and human FMT (Post-FMT), the double hu-mice on a regular mouse chow diet had  
247 increased alpha diversity measurements. After introduction of the HFD, the alpha diversity measurements  
248 dropped to near Pre-FMT levels. These data show that dietary fat content plays an important role in  
249 regulating gut microbiome diversity. However, the fecal samples from the LFD group also had a decrease  
250 in species richness compared to Post-FMT samples, which implicates other factors that may be important  
251 for gut microbiome diversity, such as dietary fiber content.

252         Multiple differences were observed in the composition of the gut microbiome with the three  
253 different diets as shown by the heatmaps of bacterial relative abundance for Order and Family taxa levels  
254 (Figure 5FG). Significant differences in the relative abundance of gut bacterial taxa between double hu-  
255 mice consuming different diets were found using Kruskal-Wallis tests with false discovery rate (FDR)

256 adjusted P values <.05 (Supplemental File Diet\_KW.xlsx). Compared to LFD samples, HFD samples had  
257 a higher relative abundance of *Verrucomicrobiaceae* (11.35%, P=0.0037 FDR) and *Lachnospiraceae*  
258 (3.48%, P=0.0025 FDR) and a lower abundance of Firmicutes (-8.71%, P=0.0300 FDR), *Clostridiales* (-  
259 5.96%, P=0.0279 FDR), and *Ruminococcaceae* (-2.44%, P=0.0028 FDR).

260 Compared to Post-FMT samples from double hu-mice fed regular mouse chow, HFD fed double  
261 hu-mice had a higher relative abundance of *Streptococcaceae* (17.32%, P=0.0001 FDR), *Bacteroides*  
262 *fragilis* (3.47%, P=0.0001 FDR), *Dorea* (2.64%, P=0.0001 FDR), *Enterobacteriaceae* (1.23%, P=0.0001  
263 FDR), *Enterococcaceae* (0.90%, P=0.0074 FDR), *Desulfovibrionaceae* (0.63%, P=0.0007 FDR) and a  
264 lower abundance of *Blautia* (-9.73%, P=0.0001 FDR), *Bacteroidaceae* (-8.30%, P=0.0001 FDR),  
265 *Clostridiales* (-5.68%, P=0.0144 FDR), and *Turicibacteraceae* (-5.61%, P=0.0001 FDR).

266 While our LFD group acted as a calorie matched control for the HFD group, we found the LFD  
267 fed double hu-mice also had an altered gut microbial composition compared to Post-FMT samples from  
268 double hu-mice fed regular mouse chow. LFD fed double hu-mice had a higher abundance of  
269 *Streptococcaceae* (16.16%, P=0.0001 FDR), *Ruminococcaceae* (2.20%, P=0.0102 FDR),  
270 *Enterococcaceae* (1.72%, P=0.0001 FDR), and *Proteobacteria* (1.22%, P=0.0443 FDR) and a lower  
271 abundance of *Blautia* (-9.97%, P=0.0001 FDR), *Verrucomicrobiaceae* (-8.93%, P= 0.0414\*),  
272 *Bacteroidaceae* (-7.03%, P=0.0001 FDR), *Turicibacteraceae* (-5.49%, P=0.0001 FDR), and  
273 *Erysipelotrichaceae* (-2.47%, P=0.0495\*). We found that differences in the both fat and fiber content of  
274 the three diets had a large impact on diversity and abundance of the gut microbiome in the double hu-  
275 mice model.

276 A random forest model was trained to predict if the gut microbiome profiles came from double  
277 hu-mice that were consuming a HFD or LFD based on the ASV features. The top 15 most important  
278 discriminatory features of the model based on area under the ROC curve were then identified. These  
279 features were scaled to 100 and plotted along with the average normalized ASV counts for each diet  
280 (Supplemental File Diet\_Importance.pdf). The top ranked features were ASV107 and ASV476, both from  
281 *Oscillospira*, with ASV107 more prevalent with a LFD and ASV476 more prevalent with a HFD.

282 Included in the top 15 features were ASVs from *Bacteroides*, *Clostridiales*, *Christensenellaceae*,  
283 *Christensenella*, *Lachnospiraceae*, *Clostridium citroniae*, *Clostridium methylpentosum*, *Oscillospira* and  
284 *Erysipelotrichaceae*. Interestingly, ASV476 from *Oscillospira*, was identified in both the HIV-1 infection  
285 and diet random forest models. It was more prevalent in both HIV-1 infected double hu-mice and in  
286 double hu-mice consuming a HFD. Using a HFD we successfully induced microbial dysbiosis in our  
287 double hu-mice model. We found that compared to regular mouse chow, a diet consisting of high-fat  
288 content and a lack of fiber significantly changed the gut microbiome composition, including a decrease in  
289 alpha diversity.

290

### 291 **High-fat diet induced gut microbial changes were associated with increased systemic inflammation** 292 **and immune activation**

293 To evaluate if the HFD fed double hu-mice had elevated levels of systemic inflammation, we  
294 measured the levels of inflammatory cytokines in plasma using multiplex immunoassays. Double hu-mice  
295 consuming a HFD had significantly higher levels of IL-1 $\beta$  than mice on the LFD (Figure 6A).  
296 Interestingly, the levels of IL-1 $\beta$  increased in the HFD fed double hu-mice in each timepoint tested  
297 (Figure 6B). The levels of inflammatory cytokines IL-6 and IFN- $\gamma$  were both significantly higher in mice  
298 consuming the HFD compared to the LFD (Figure 6CDEF). However, levels of TNF- $\alpha$  were not significantly  
299 different between the two groups of mice, with the highest measured level found in the LFD group at  
300 0.5 weeks post diet initiation (Figure 6GH). Feeding with the HFD quickly raised the levels of systemic  
301 inflammatory markers IL-1 $\beta$ , IL-6, and IFN- $\gamma$ , with progressively increased IL-1 $\beta$  at each measured  
302 timepoint. It was clear that the HFD not only led to microbial dysbiosis, but also increased the levels of  
303 systemic inflammation.

304 Along with inflammation, increased immune activation is an important pathogenic factor for  
305 enhancing HIV-1 transmission and pathogenesis. Using flow cytometry, we measured immune activation  
306 of human immune cells in peripheral blood (Figure 7AB). Unlike the HIV-1 infected double hu-mice,

307 CD4+ T cell populations in both HFD and LFD groups (Table 1) remained steady. The activated T cell  
308 populations of CD4+ CD38+ and CD8+ CD38+ were increased in the HFD group compared to the LFD  
309 group. Additionally, the CD4+ HLA-DR+ population increased over time in the HFD fed group and the  
310 largest population of CD8+ HLA-DR+ cells were observed at 3 weeks after diet initiation in the HFD  
311 group. The expression of CD69 did not change with the introduction of the HFD or LFD in either CD4+ or  
312 CD8+ T cells. The HFD significantly altered the gut microbial composition in double hu-mice and was  
313 associated with both increased systemic inflammation and immune activation.

314

### 315 **Relationships between the gut microbiome and systemic inflammation and immune activation**

316 . To better understand the bidirectional relationship between the gut microbiota and immune  
317 system, we compared plasma derived inflammatory cytokine levels of IL-1 $\beta$ , IL-6, IFN- $\gamma$ , and TNF- $\alpha$  with  
318 matched gut microbiome profiles from our double hu-mice experiments (Supplemental File  
319 Correlations.xlsx). Ten ASVs were significantly correlated with IL-1 $\beta$ , including 7 from *Clostridiales* and 3  
320 from *Klebsiella* (Supplemental File Cytokine\_Correlations.pdf). None of the significant ASVs were found  
321 in the sequenced human donor samples. Interestingly, 9 of 10 ASVs correlated with IL-1 $\beta$  were also  
322 significantly correlated with IL-6. Additionally, IL-6 was significantly correlated with ASV726  
323 *Christensenellaceae*, which was also found in human donor samples. 20 ASVs were significantly  
324 correlated with IFN- $\gamma$ , of which 8 were also found in human donor samples. Significantly correlated ASVs  
325 included *Bacteroides eggerthii*, *Blautia obeum*, and *Coprococcus catus*. Several ASVs mapped to  
326 *Clostridiales*, including two from *Oscillospira*. Twenty-three ASVs were significantly correlated with TNF-  
327  $\alpha$ , 10 of which were also found in human donor samples. Some of the significant ASVs were mapped to  
328 *Coriobacteriaceae*, *Bacteroides uniformis*, *Rikenellaceae*, *Enterococcus*, *Blautia*, *Oscillospira*; *Citrobacter*,  
329 and *Klebsiella*. Interestingly, many the ASVs that correlated with IL-1 $\beta$  and IL-6 were the same and these  
330 ASVs were not found in the human donor samples. However, ASVs that correlated with IFN- $\gamma$ , and TNF- $\alpha$

331 were much more likely to be found in human donor samples. While not a direct sign of causation, many  
332 of the identified ASVs came from bacteria that have established interactions with the immune system or  
333 are known to be potentially pathogenic.

334 To better understand the relationship between the human-like gut microbiome and human  
335 immune cell activation, we compared flow cytometry data derived from peripheral blood cells with  
336 matched gut microbiome profiles from our double hu-mice experiments (Supplemental File  
337 Correlations.xlsx). We identified 54 significant correlations corresponding to 37 unique ASVs, including 6  
338 ASVs that can be found in the human donor samples. ASV14 *Bacteroides* and ASV242 *Clostridiales*, were  
339 positively correlated with several markers of CD8+ T cell immune activation (Supplemental Figure  
340 Immune\_Correlations.pdf). ASV280 *Barnesiellaceae* was negatively correlated with CD4+ T cells and  
341 positively correlated with activation of CD8 T cells. Interestingly, ASV280 was also positively correlated  
342 with the level of plasma IFN- $\gamma$ . Additionally, several more ASVs were negatively correlated with CD4 T  
343 cells including ASV535 *Christensenella*, ASV606 *Christensenellaceae*, and ASV644 *Ruminococcaceae*.  
344 ASV717 *Clostridiales* was negatively correlated with human CD45+ immune cells and positively  
345 correlated with CD8 T cell immune activation, while ASV870 *Clostridiales* was also positively correlated  
346 with CD8 T cell immune activation. ASV955 *Oscillospira* and ASV965 *Oscillospira* were both negatively  
347 correlated with CD4 T cells and positively correlated with CD8 T cell activation. Additionally, several ASVs  
348 were identified to be positively correlated with both markers for CD8 T cell activation and plasma IFN- $\gamma$ .  
349 These ASVs included members of *Ruminococcaceae*, *Lachnospiraceae*, and *Bacteroides eggerthii*. We  
350 were able to identify several ASVs that correlated with both CD4 T cell loss and CD8 T cell activation.  
351 Further, ASVs that correlated with IFN- $\gamma$  were often also correlated with CD8 T cell activation.

352

353 **Discussion**

354           The gut microbiome and immune system have a complex and interdependent relationship. As we  
355 previously reported and also confirmed in this study, we found that the murine gut microbiome of regular  
356 hu-BLT mice (hu-mice) had lower levels of diversity and differed greatly in composition from the  
357 microbiomes of our human fecal donors [58, 59]. These large differences between the gut microbiomes of  
358 murine origin from hu-mice and humans may limit the translatability of experimental results [55, 56]. In  
359 this study, the double hu-mice harboring both a human immune system and human gut microbiome  
360 allowed for the study of the relationship between the human gut microbiome and human immune system  
361 during HIV-1 infection and a HFD. We tracked the compositional changes to the gut microbiome before  
362 and after human FMT, during HIV-1 infection for up to 12 weeks, and HFD for up to 7 weeks. During  
363 these longitudinal studies, we also measured plasma pro-inflammatory cytokines and quantified immune  
364 activation of human CD4 and CD8 T cells isolated from peripheral blood and spleen.

365           HIV-1 infection profoundly alters the human immune system with long lasting consequences,  
366 such as persistent immune activation and inflammation despite suppressive ART [14, 24, 70, 71]. The gut  
367 and gut microbiome may play an important role in many aspects of HIV-1 mucosal transmission, CD4+ T  
368 cell death, and the elevated risk of comorbidities in PLWH on ART. Therefore, changes in the gut  
369 microbiome during HIV-1 infection have been widely studied [19, 20, 72-92]. However, many of these  
370 human studies varied in sampling and analytical methods, as well as geography, age, sex, diet, and  
371 lifestyle choices of the study subjects. Further, it is difficult to study very early stages of HIV-1 infection  
372 and there is often a wide range of disease progression rate, timing of ART treatment, and treatment  
373 outcomes in human studies. As such, it has been difficult to discern changes in the gut microbiome due to  
374 HIV-1 infection or other factors across the various studies. One major finding in earlier studies was that  
375 the gut microbiome profiles of HIV infection had higher levels of *Prevotella* [72, 77, 81, 86]. However,  
376 studies controlling for lifestyle choices, such as men who have sex with men (MSM), have not found  
377 significant changes in *Prevotella* levels due to infection, but rather have found high levels of *Prevotella* in  
378 MSM [19, 80, 87, 89, 93-96]. While important questions remain as to the impact of gut microbiome  
379 profiles with a high abundance of *Prevotella* on HIV-1 transmission, pathogenesis, and treatment, this is a

380 clear example of the difficulty of studying the gut microbiome in humans due to the many confounding  
381 factors.

382 Non-human primates (NHP) infected with SIV as animal models have successfully been used to  
383 study many aspects of HIV-1 pathogenesis. However, the subtle changes in the gut microbiome of SIV  
384 infected NHP were not consistent with the more significant changes observed in HIV-1 infected human  
385 studies [97-99]. In this study, we utilized a unique double hu-mice model to complement the studies  
386 performed in humans and NHP. Compared to NHP, our double hu-mice model has the advantage of using  
387 HIV-1 instead of SIV for infection and have both a human-like gut microbiome and human immune  
388 system. Importantly, we can use the model to track changes in the gut microbiome longitudinally, from  
389 very early to chronic disease stages, while controlling for many of the confounding factors that make  
390 studies in humans difficult.

391 In this study, compared to uninfected double hu-mice, infected double hu-mice had a higher  
392 relative abundance of *Bifidobacteriaceae* and *Ruminococcaceae* and a lower abundance of  
393 *Lactobacillaceae* and *Turicibacteraceae*. Compared to pre-infection samples, infected double hu-mice  
394 had a higher relative abundance of *Bacteroidaceae*, *Bifidobacteriaceae*, *Clostridiaceae*, *Rikenellaceae*,  
395 and *Ruminococcaceae* and a lower relative abundance of *Erysipelotrichaceae*, *Lachnospiraceae*, and  
396 *Verricomicrobiaceae*. A meta-analysis of sex and lifestyle matched controlled studies found that HIV-  
397 infected populations were enriched with *Erysipelotrichaceae*, *Enterobacteriaceae*, *Desulfovibrionaceae*,  
398 and *Fusobacteria* and depleted of *Lachnospiraceae*, *Ruminococceae*, *Bacteroides*, and *Rikenellaceae*[93].  
399 In this study, we did not find large shifts in the gut microbiome due to HIV-1 infection alone. We believe  
400 that housing the hu-mice in controlled environments without natural exposure to outside pathogens may  
401 account for why we did not observe increases in relative abundance of bacteria like *Erysipelotrichaceae*,  
402 *Enterobacteriaceae*, *Desulfovibrionaceae*. Further, increases in *Fusobacteria* may be linked to ART  
403 treatment itself and not untreated HIV-1 infection. The double hu-mice model may be further improved  
404 upon by potentially introducing outside microbes during infection and by studying the impact of ART use  
405 by itself and during treatment of HIV-1 infection.



406           The altered gut microbiome due to HIV-1 infection may also play an important role in HIV-1  
407 pathogenesis, including the loss of CD4 T cells, inflammation, and immune activation. In this study, we  
408 found that HIV-1 infection of double hu-mice increased the levels of systemic pro-inflammatory  
409 cytokines IL-1 $\beta$ , IL-6, IFN- $\gamma$ , and TNF- $\alpha$ . As expected, HIV-1 infected double hu-mice had significantly  
410 decreased CD4 T cells and increased immune activation manifested in three populations of activated CD8  
411 T cells (CD38+, CD69+, or HLA-DR+). Moreover, CD4 T cell loss and T cell immune activation was  
412 also confirmed in lymphocytes isolated from the spleens of infected double hu-mice. We also investigated  
413 the relationships between the observed immunopathogenesis with the gut microbiome. We found nine  
414 ASVs that were negatively correlated with CD4 T cells including ASVs from *Barnesiellaceae*,  
415 *Christensenellaceae*, *Lachnospiraceae*, *Oscillospira*, and, *Ruminococcus*. ASVs from *Bacteroidales* and  
416 *Odoribacter* were correlated with increased CD4+ CD38+ populations. Thirty-seven ASVs positively  
417 correlated with increased CD8 T cell activation, of which 8 were also positively correlated with increased  
418 levels of plasma IFN- $\gamma$ . These 8 ASVs included members of *Barnesiellaceae*, *Lachnospiraceae*,  
419 *Ruminococcaceae*, *Oscillospira*, and *Bacteroides eggerthii*. Our random forest model trained to  
420 distinguish gut microbiome profiles of HIV-1 infected and uninfected double hu-mice identified several  
421 bacteria with known links to the immune system including ASVs from *Ruminococcus*, *Lachnospiraceae*,  
422 *Christensenellaceae*, *Oscillospira*, *Dorea*, *Butyricicoccus pullicaecorum* and *Blautia producta*. While not  
423 a direct measure of causation, these correlations provide a foundation for future study in order to narrow  
424 down key groups of bacteria that play a role in immunopathogenesis during HIV-1 infection.

425           Another important aspect of this study was the establishment of gut microbial dysbiosis in double  
426 hu-mice using a HFD. Establishing a state of microbial dysbiosis from a gut microbiome engrafted from a  
427 healthy human fecal donor sample was an important first step in order to determine the role the gut  
428 microbiome in HIV-1 rectal transmission. We showed that a HFD quickly lowered the alpha diversity and  
429 changed the composition of the gut microbiome. We also found that double hu-mice that consumed a  
430 HFD had increased levels of pro-inflammatory cytokines IL-1 $\beta$ , IL-6, IFN- $\gamma$ , along with increased

431 populations of activated CD4 and CD8 T cells. We showed that CD4+ CD38+ population, which were  
432 decreased as a result of HIV-1 infection, were increased with a HFD. In our study, we showed that diet  
433 and the corresponding gut microbial dysbiosis can have drastic systemic effects on inflammation and  
434 immune activation. Future studies are needed to determine if gut microbial dysbiosis impacts  
435 susceptibility to HIV-1 rectal transmission and subsequent pathogenesis.

436 We also would like to point out the limitations of our study. First, we only characterized the gut  
437 bacteria and did not investigate the gut virome. During HIV-1 infection there is an expansion of the  
438 virome which may contribute to the observed persistent immune activation and inflammation in PLWH  
439 [80]. Second, metagenomic sequencing would also capture functional changes in the gut microbiota  
440 important to HIV-1 pathogenesis. Last, the double hu-mice model could be expanded to include patient  
441 derived fecal donor samples and fecal donors with diverse gut microbiome profiles. Going forward, we  
442 believe that double hu-mice could provide a complimentary model to help answer some of the  
443 outstanding questions about the relationship between the gut microbiome and HIV-1 infection.

444

## 445 **Conclusions**

446 Here, we describe the changes in the gut microbiome and human immune system due to HIV-1  
447 infection and a HFD using our double hu-mice model. HIV-1 infection led to changes in the composition  
448 of the human-like gut microbiome that was associated with CD4 T cell loss and high levels of  
449 inflammation and immune activation. Microbial dysbiosis was quickly established in double hu-mice  
450 through feeding a HFD and led to systemic immune activation and inflammation. We also identified a  
451 subset of gut bacteria that was closely associated with systemic inflammation and immune activation in  
452 double hu-mice infected with HIV-1 or fed a HFD. Importantly, this study demonstrated how the double  
453 hu-mice model can be used to longitudinally study the complex in vivo interactions of the gut  
454 microbiome and human immune system.

455

## 456 **Methods**

457 **Generation of hu-BLT mice**

458 All methods described here were conducted as we previously reported in accordance with  
459 Institutional Animal Care and Research Committee (IACUC)-approved protocols at the University of  
460 Nebraska-Lincoln (UNL)[57, 60, 61, 64]. The IACUC at the University of Nebraska-Lincoln (UNL) has  
461 approved two protocols related to generating and using hu-BLT mice, including Double Hu-Mice.  
462 Additionally, the Scientific Research Oversight Committee (SROC) at UNL has also approved the use of  
463 human embryonic stem cells and fetal tissues, which are procured from the Advanced Bioscience  
464 Resources for humanized mice studies (SROC# 2016—1-002).

465 Briefly, 6- to 8-week-old female NSG mice (NOD.*Cg-Prkdc<sup>scid</sup>Il2rg<sup>tm1Wjl</sup>/SzJ*, catalog number  
466 005557; (Jackson Laboratory) were housed and maintained in individual microisolator cages in a rack  
467 system capable of managing air exchange with prefilters and HEPA filters. Room temperature, humidity,  
468 and pressure were controlled, and air was also filtered. Mice given autoclaved and acidified drinking  
469 water ab libitum and were fed one of the following diets determined by the experimental group, irradiated  
470 Teklad global 14% protein rodent chow (Teklad 2914), irradiated Teklad Rodent Diet With 10 kcal% Fat  
471 (No Sucrose) (Teklad K12450Ki), or irradiated Teklad Rodent Diet With 60% kcal% Fat (Teklad  
472 D12492i). On the day of surgery, mice received whole-body irradiation at the dose of 12 cGy/gram of  
473 body weight with the RS200 X-ray irradiator (RAD Source Technologies, Inc., GA). Each irradiated  
474 mouse was given 130-170 ul of a mixture of Ketamine/Xylazine (0.27 ml of Ketamine at the  
475 concentration of 100 mg/ml and 0.03 ml of Xylazine at the concentration of 100 mg/ml to 2.7 ml of sterile  
476 saline) by intraperitoneal (IP) injection for anesthesia. Additionally, each mouse was given 100 ul  
477 Buprenex (half-life 72 hours, 1mg/kg of body weight) by subcutaneous injection for long lasting pain  
478 management and 100 ul (858 ug) Cefazolin by IP injection for antibiotic prophylaxis. Isoflurane gas at  
479 3-5% was given if additional anesthesia was needed at any point during surgery. After proper levels of  
480 anesthesia were verified by pedal reflex testing, each mouse was implanted with one piece of human fetal  
481 thymic tissue fragment sandwiched between two pieces of human fetal liver tissue fragments within the  
482 murine left renal capsule. Within 6 hours of surgery, mice were injected via the tail vein with  $1.5 \times 10^5$  to

483  $5 \times 10^5$  CD34<sup>+</sup> hematopoietic stem cells isolated from human fetal liver tissues. Human fetal liver and  
484 thymus tissues were procured from Advanced Bioscience Resources (Alameda, CA). After 10 weeks,  
485 human immune cell reconstitution in peripheral blood was measured by a fluorescence-activated cell  
486 sorter (FACS) Aria II flow cytometer (BD Biosciences, San Jose, CA) using antibodies against mCD45-  
487 APC, hCD45-FITC, hCD3-PE, hCD19-PE/Cy5, hCD4-Alexa 700, and hCD8-APC-Cy7 (catalog numbers  
488 103111, 304006, 300408, 302209, 300526, and 301016, respectively; BioLegend, San Diego, CA). Raw  
489 data were analyzed with FlowJo (version 10.0; FlowJo LLC, Ashland, OR). All humanized mice used in  
490 this study had high levels of human immune cell reconstitution with an average of 89.4% hCD45<sup>+</sup> cells in  
491 peripheral blood 10 weeks post-surgery. The mice were randomly assigned into experimental groups with  
492 similar immune reconstitution levels. Mice were euthanized at humane study endpoints with carbon  
493 dioxide followed by cervical dislocation in accordance with approved Institutional Animal Care and  
494 Research Committee (IACUC)-approved protocols at the University of Nebraska-Lincoln (UNL).  
495 Following the approved protocols, animals were euthanized before or at the point of observed impaired  
496 ambulation, prolonged drowsiness or aversion to activity, lack or physical or mental alertness, prolonged  
497 inappetence, difficulty breathing, chronic diarrhea or constipation, inability to remain upright, or at the  
498 discretion of the Veterinary Staff.

499

## 500 **Antibiotic treatment**

501 A broad-spectrum antibiotic cocktail was prepared fresh daily consisting of Metronidazole (1  
502 g/L), Neomycin (1 g/L), Vancomycin (0.5 g/L), and Ampicillin (1 g/L). The antibiotic cocktail was given  
503 to the mice ad libitum in the drinking water along with grape flavored Kool-Aid to improve palatability.  
504 Control group mice were given only grape flavored Kool-Aid in the drinking water. During antibiotic  
505 treatment, cages were changed daily to limit re-inoculation of pre-existing bacteria to the mice due to  
506 their coprophagic behavior. Antibiotics were given for 14 days for all double hu-mice. Post-antibiotic  
507 treatment, mice were given autoclaved non-acidified deionized drinking water. Body weight was carefully

508 monitored during this time and If needed, mice were treated with Intraperitoneal (IP) injections of  
509 Ringer's solution to mitigate any effects of dehydration.

510

### 511 **Donor samples and Fecal transplant**

512 At 24 and 48 hours after the completion of antibiotic pre-treatment, mice were given 200 ul of  
513 human fecal material via oral gavage. OpenBiome supplied 3 FMT Upper Delivery Microbiota  
514 Preparations from 3 different healthy human donors (Donor 65, Donor 74, Donor 82). Samples were  
515 thawed once before fecal transplant to aliquot the samples within an anaerobic chamber. During this step,  
516 an equal portion of each of the samples were mixed together to create an unbiased human donor sample.

517

### 518 **HIV-1 infection and q-RT-PCR**

519 To infect double hu-mice with HIV-1, mice were intraperitoneally injected with  $4.5 \times 10^5$  TCID of an  
520 equal mixture of HIV-1<sub>SUMA</sub> and HIV-1<sub>JRC5F</sub>. To verify infection, plasma viral RNA was extracted using a  
521 QIAamp ViralRNA minikit (Qiagen). Plasma viral load was conducted using reverse transcriptase  
522 quantitative PCR (qRT-PCR) on a C1000 ThermalCycler and the CFX96 Real-Time system (Bio-Rad)  
523 and the TaqMan FastVirus 1-Step master mix (Life Technologies). As previously reported, the following  
524 primers were used for the plasma viral load assay: Forward Primer: GCCTCAATAAAGCTTGCCTTGA;  
525 Reverse Primer: GGGCGCCACTGCTAGAGA; Probe: /56-  
526 FAM/CCAGAGTCA/ZEN/CACAACAGACGGGCACA/3IABkFQ/[64].

527

### 528 **Multiplex immunoassay for measuring plasma cytokines**

529 Plasma from double hu-mice was tested for the following inflammatory cytokines: IFN- $\gamma$ , IL-1 $\beta$ , IL-2, IL-  
530 4, IL-6, IL-10, IL-12 p70, IL-17A, TNF $\alpha$  using the ProcartaPlex high sensitivity 9-Plex Human Panel  
531 (EPXS090-12199-901, Thermofisher Scientific, Waltham, MA). Samples were measured using a  
532 Luminex MAGPIX instrument (Luminex Corporation, Austin, TX).

533

534 **Lymphocytes isolation and immune activation flow cytometry panel**

535 Splens from euthanized double hu-mice were placed on a strainer with 70- $\mu$ m nylon mesh  
536 (Cat#22363548, Fisher Scientific) and the strainer was placed on a 50ml Centrifuge tube (Corning).  
537 Spleen tissue was gently pressed with the flat end of a 5-ml syringe to release the splenocytes into cell  
538 cultural medium that contained 90% RPMI-1640 (Cat#11875, Life technologies) supplemented with 10%  
539 heat-inactivated fetal bovine serum [HI-FBS] (Cat#SH30071.03, Thermo Scientific), penicillin [100  
540 IU/ml]-streptomycin [100 ug/ml] (Quality Biological, Inc), 2mM/ml L-glutamine (Cat#25-005-CI,  
541 Corning). Slowly, the splenocyte suspension was layered onto Histopaque-1077 (Sigma-Aldrich), and  
542 centrifuge at 350 $\times$ g for 30 mins at room temperature. The “buffy coat” mononuclear cells layer were  
543 transferred into a 50ml Centrifuge tube (Corning) and washed with cold PBS. Human immune cell  
544 activation in peripheral blood and lymphocytes isolated from the spleen were measured by a fluorescence-  
545 activated cell sorter (FACS) Aria II flow cytometer (BD Biosciences, San Jose, CA) using antibodies  
546 against mCD45-APC, hCD45-FITC, hCD3-PE, hCD4-Alexa Fluor 700, hHLA-DR-BV421, hCD38-PE-  
547 Cy5, hCD69-BV785, hCD8a-APC-Cy7, mCD45-APC, Viability-APC (catalog numbers 304006, 300408,  
548 300526, 307636, 303508, 310932, 301016, 103112 (BioLegend, San Diego, CA), and 65-0864-14  
549 (eBioscience, San Diego, CA). Raw data were analyzed with FlowJo (version 10.0; FlowJo LLC,  
550 Ashland, OR).

551

552 **Mouse fecal collection and DNA extraction**

553 Individual mice were placed into autoclaved paper bags within a biosafety hood until fresh fecal  
554 samples were produced. Fecal samples were stored in 1.5 ml Eppendorf tubes at -80 °C until DNA  
555 extraction. DNA was extracted from the fecal samples using the phenol:chloroform:isoamyl alcohol with  
556 bead beating method described previously [100]. Briefly, fecal samples were washed three times with 1  
557 ml PBS buffer (pH 7). After the addition of 750 ul of lysis buffer, samples were transferred to tubes  
558 containing 300 mg of autoclaved 0.1 mm zirconia/silica beads (Biospec). 85 ul of 10% SDS solution and  
559 40 ul of Proteinase K (15mg/ml, MC500B Promega) were added and samples were incubated for 30

560 minutes at 60° C. 500 ul of Phenol:Chloroform:Isoamyl alcohol (25:24:1) was added and then samples  
561 were vortexed. Samples were then put into a bead beater (Mini-beadbeater 16 Biospec) for 2 minutes to  
562 physically lyse the cells. The upper phase of the sample was collected and an additional 500ul of  
563 Phenol:Chloroform:Isoamyl alcohol (25:24:1) was added. After samples were vortexed and spun down,  
564 the DNA in the upper phase was further purified twice with 500 ul of Phenol:Chloroform:Isoamyl alcohol  
565 (25:24:1). and was then precipitated with 100% Ethanol (2.5 x volume of sample) and 3M Sodium acetate  
566 (.1 x volume of sample) overnight at -20° C. Samples are then centrifuged and dried at room temperature.  
567 DNA was resuspended in 100 ul of Tris-Buffer (10mM, pH8) and stored at -20° C. DNA samples were  
568 quality checked by nanodrop (ND-1000 Nanodrop).

569

#### 570 **16S rRNA gene sequencing**

571 16S rRNA gene sequencing was performed at the University of Nebraska Medical Center  
572 Genomics Core Facility. DNA normalization and library prep were performed followed by V3-V4 16S  
573 rRNA amplicon gene sequencing using a MiSeqV2 (Illumina) The following primer sequences were  
574 used: (Primer sequences: Forward Primer = 5'  
575 TCGTCGGCAGCGTCAGATGTGTATAAGAGACAGCCTACGGGNGGCWGCAG 16S Amplicon  
576 PCR Reverse Primer = 5'  
577 GTCTCGTGGGCTCGGAGATGTGTATAAGAGACAGGACTACHVGGGTATCTAATCC  
578 Illumina overhangs: Forward overhang: 5'  
579 TCGTCGGCAGCGTCAGATGTGTATAAGAGACAG□[locusspecific sequence] Reverse overhang: 5'  
580 GTCTCGTGGGCTCGGAGATGTGTATAAGAGACAG□[locusspecific sequence]).

581

#### 582 **Generation of the amplicon sequence variant table and data analysis**

583 Illumina-sequenced paired-end fastq files were demultiplexed by sample and barcodes were  
584 removed by the sequencing facility. The University of Nebraska Holland Computer Center Crane cluster

585 was used to run the DADA2 v1.8 R package in order to generate an amplicon sequence variant (ASV)  
586 table[101]. The DADA2 pipeline was performed as follows, sequences were filtered and trimmed during  
587 which any remaining primers, adapters, or linkers were also removed. The sequencing error rates were  
588 estimated using a random subset of the data. Dereplication of the data combined all identical sequencing  
589 reads into unique sequences with a corresponding abundance. The core sample inference algorithm was  
590 then applied to the dereplicated data. The forward and reverse reads were then joined to create the full  
591 denoised sequences and an initial ASV table was generated. Any sequences outside the expected length  
592 for the V3-V4 amplicon were then filtered from the table. Chimeric sequences were then removed and a  
593 final ASV table was generated. Taxonomy was assigned using the Greengenes 13.8 database and RDP  
594 Classifier with a minimal confidence score of 0.80 [102, 103]. Analysis was performed using R package  
595 mctoolsr and samples were rarified to 4630 ASVs for downstream analysis. GraphPad Prism 5 and  
596 Tableau were used to create some figures. Correlations were performed in R using the rcorr.adjust  
597 function in the Hmisc package to compute matrices Spearman correlations along with the pairwise p-  
598 values among the correlations. The p-values were corrected for multiple inference using Holm's method.  
599 The random forest models and accompanied variable importance values were generated in R using the  
600 randomForest package.

601

## 602 **Declarations**

### 603 **Ethics approval and consent to participate**

604 All methods described here were conducted as we previously reported in accordance with Institutional  
605 Animal Care and Research Committee (IACUC)-approved protocols at the University of Nebraska-  
606 Lincoln (UNL)[57, 60, 61, 64]. The IACUC at the University of Nebraska-Lincoln (UNL) has approved  
607 two protocols related to generating and using hu-BLT mice, including Double Hu-Mice. Additionally, the  
608 Scientific Research Oversight Committee (SROC) at UNL has also approved the use of human embryonic  
609 stem cells and fetal tissues, which are procured from the Advanced Bioscience Resources for humanized  
610 mice studies (SROC# 2016—1-002).



611

612 **Consent for publication**

613 Not applicable

614

615 **Availability of data and material**

616 The datasets generated during the current study are available in the NCBI SRA repository,

617 [<https://www.ncbi.nlm.nih.gov/bioproject/PRJNA612824>].

618

619 **Competing interests**

620 The authors declare that they have no competing interests.

621

622 **Funding**

623 This study is supported in part by the National Institutes of Health (NIH) Grants R01AI124804 (to Jarvis),

624 R33AI122377 (Planelles), P30 MH062261-16A1 Chronic HIV Infection and Aging in NeuroAIDS

625 (CHAIN) Center (to Buch & Fox), 1R01AI111862 and R21 AI143405 to Q Li. The funders had no role

626 in study design, data collection and analysis, preparation of the manuscript, or decision for publication.

627

628 **Authors' contributions**

629 LD and QL designed the experiments and wrote the manuscript. LD performed experiments and analyzed

630 the data. ART provided input on experimental design and manuscript preparation.

631

632 **Acknowledgments**

633 We would like to thank Pallabi Kundu, Rachel Kubik, Saroj Lohani, Yilun Chang, and Jianshiu Zhang for

634 their assistance in generating hu-BLT mice. We would like to acknowledge the UNMC Genomics Core

635 Facility who receives partial support from the Nebraska Research Network In Functional Genomics NE-

636 INBRE P20GM103427-14, The Molecular Biology of Neurosensory Systems CoBRE P30GM110768,

637 The Fred & Pamela Buffett Cancer Center - P30CA036727, The Center for Root and Rhizobiome  
638 Innovation (CRRRI) 36-5150-2085-20, and the Nebraska Research Initiative. We would like to thank  
639 University of Nebraska—Lincoln Life Sciences Annex and their staff for their assistance.

640

641 **References**

- 642 1. Gilbert JA, Blaser MJ, Caporaso JG, Jansson JK, Lynch SV, Knight R: **Current**  
643 **understanding of the human microbiome.** *Nat Med* 2018, **24**:392-400.
- 644 2. Mowat AM, Viney JL: **The anatomical basis of intestinal immunity.** *Immunol Rev* 1997,  
645 **156**:145-166.
- 646 3. Turnbaugh PJ, Ley RE, Mahowald MA, Magrini V, Mardis ER, Gordon JI: **An obesity-**  
647 **associated gut microbiome with increased capacity for energy harvest.** *Nature* 2006,  
648 **444**:1027-1031.
- 649 4. Gopalakrishnan V, Spencer CN, Nezi L, Reuben A, Andrews MC, Karpinets TV, Prieto PA,  
650 Vicente D, Hoffman K, Wei SC, et al: **Gut microbiome modulates response to anti-PD-1**  
651 **immunotherapy in melanoma patients.** *Science* 2018, **359**:97-103.
- 652 5. Routy B, Le Chatelier E, Derosa L, Duong CPM, Alou MT, Daillere R, Fluckiger A,  
653 Messaoudene M, Rauber C, Roberti MP, et al: **Gut microbiome influences efficacy of**  
654 **PD-1-based immunotherapy against epithelial tumors.** *Science* 2018, **359**:91-+.
- 655 6. Clemente JC, Manasson J, Scher JU: **The role of the gut microbiome in systemic**  
656 **inflammatory disease.** *Bmj-British Medical Journal* 2018, **360**.
- 657 7. Qin J, Li R, Raes J, Arumugam M, Burgdorf KS, Manichanh C, Nielsen T, Pons N, Levenez  
658 F, Yamada T, et al: **A human gut microbial gene catalogue established by metagenomic**  
659 **sequencing.** *Nature* 2010, **464**:59-65.
- 660 8. Kau AL, Ahern PP, Griffin NW, Goodman AL, Gordon JI: **Human nutrition, the gut**  
661 **microbiome and the immune system.** *Nature* 2011, **474**:327-336.
- 662 9. Hooper LV, Littman DR, Macpherson AJ: **Interactions Between the Microbiota and the**  
663 **Immune System.** *Science* 2012, **336**:1268-1273.
- 664 10. Maynard CL, Elson CO, Hatton RD, Weaver CT: **Reciprocal interactions of the intestinal**  
665 **microbiota and immune system.** *Nature* 2012, **489**:231-241.
- 666 11. Schirmer M, Smeekens SP, Vlamakis H, Jaeger M, Oosting M, Franzosa EA, Horst RT,  
667 Jansen T, Jacobs L, Bonder MJ, et al: **Linking the Human Gut Microbiome to**  
668 **Inflammatory Cytokine Production Capacity.** *Cell* 2016, **167**:1897.
- 669 12. Veazey RS, DeMaria M, Chalifoux LV, Shvetz DE, Pauley DR, Knight HL, Rosenzweig M,  
670 Johnson RP, Desrosiers RC, Lackner AA: **Gastrointestinal tract as a major site of CD4+ T**  
671 **cell depletion and viral replication in SIV infection.** *Science* 1998, **280**:427-431.
- 672 13. Guadalupe M, Reay E, Sankaran S, Prindiville T, Flamm J, McNeil A, Dandekar S: **Severe**  
673 **CD4+ T-cell depletion in gut lymphoid tissue during primary human immunodeficiency**  
674 **virus type 1 infection and substantial delay in restoration following highly active**  
675 **antiretroviral therapy.** *J Virol* 2003, **77**:11708-11717.

- 676 14. Brenchley JM, Schacker TW, Ruff LE, Price DA, Taylor JH, Beilman GJ, Nguyen PL, Khoruts  
677 A, Larson M, Haase AT, Douek DC: **CD4+ T cell depletion during all stages of HIV disease**  
678 **occurs predominantly in the gastrointestinal tract.** *J Exp Med* 2004, **200**:749-759.
- 679 15. Li Q, Duan L, Estes JD, Ma ZM, Rourke T, Wang Y, Reilly C, Carlis J, Miller CJ, Haase AT:  
680 **Peak SIV replication in resting memory CD4+ T cells depletes gut lamina propria CD4+**  
681 **T cells.** *Nature* 2005, **434**:1148-1152.
- 682 16. Mattapallil JJ, Douek DC, Hill B, Nishimura Y, Martin M, Roederer M: **Massive infection**  
683 **and loss of memory CD4+ T cells in multiple tissues during acute SIV infection.** *Nature*  
684 2005, **434**:1093-1097.
- 685 17. Li Q, Estes JD, Duan L, Jessurun J, Pambuccian S, Forster C, Wietgreffe S, Zupancic M,  
686 Schacker T, Reilly C, et al: **Simian immunodeficiency virus-induced intestinal cell**  
687 **apoptosis is the underlying mechanism of the regenerative enteropathy of early**  
688 **infection.** *J Infect Dis* 2008, **197**:420-429.
- 689 18. Somsouk M, Estes JD, Deleage C, Dunham RM, Albright R, Inadomi JM, Martin JN, Deeks  
690 SG, McCune JM, Hunt PW: **Gut epithelial barrier and systemic inflammation during**  
691 **chronic HIV infection.** *Aids* 2015, **29**:43-51.
- 692 19. Vujkovic-Cvijin I, Dunham RM, Iwai S, Maher MC, Albright RG, Broadhurst MJ,  
693 Hernandez RD, Lederman MM, Huang Y, Somsouk M, et al: **Dysbiosis of the gut**  
694 **microbiota is associated with HIV disease progression and tryptophan catabolism.** *Sci*  
695 *Transl Med* 2013, **5**:193ra191.
- 696 20. Dinh DM, Volpe GE, Duffalo C, Bhalchandra S, Tai AK, Kane AV, Wanke CA, Ward HD:  
697 **Intestinal microbiota, microbial translocation, and systemic inflammation in chronic**  
698 **HIV infection.** *J Infect Dis* 2015, **211**:19-27.
- 699 21. Marchetti G, Tincati C, Silvestri G: **Microbial translocation in the pathogenesis of HIV**  
700 **infection and AIDS.** *Clin Microbiol Rev* 2013, **26**:2-18.
- 701 22. Marchetti G, Bellistri GM, Borghi E, Tincati C, Ferramosca S, La Francesca M, Morace G,  
702 Gori A, Monforte AD: **Microbial translocation is associated with sustained failure in**  
703 **CD4+ T-cell reconstitution in HIV-infected patients on long-term highly active**  
704 **antiretroviral therapy.** *AIDS* 2008, **22**:2035-2038.
- 705 23. Brenchley JM, Price DA, Schacker TW, Asher TE, Silvestri G, Rao S, Kazzaz Z, Bornstein E,  
706 Lambotte O, Altmann D, et al: **Microbial translocation is a cause of systemic immune**  
707 **activation in chronic HIV infection.** *Nat Med* 2006, **12**:1365-1371.
- 708 24. Hunt PW, Sinclair E, Rodriguez B, Shive C, Clagett B, Funderburg N, Robinson J, Huang Y,  
709 Epling L, Martin JN, et al: **Gut epithelial barrier dysfunction and innate immune**  
710 **activation predict mortality in treated HIV infection.** *J Infect Dis* 2014, **210**:1228-1238.
- 711 25. Anselmi A, Vendrame D, Rampon O, Giaquinto C, Zanchetta M, De Rossi A: **Immune**  
712 **reconstitution in human immunodeficiency virus type 1-infected children with**  
713 **different virological responses to anti-retroviral therapy.** *Clin Exp Immunol* 2007,  
714 **150**:442-450.
- 715 26. Lawn SD, Butera ST, Folks TM: **Contribution of immune activation to the pathogenesis**  
716 **and transmission of human immunodeficiency virus type 1 infection.** *Clinical*  
717 *microbiology reviews* 2001, **14**:753-777.
- 718 27. Jiang W, Lederman MM, Hunt P: **Plasma levels of bacterial DNA correlate with immune**  
719 **activation and the magnitude of immune restoration in persons with antiretroviral-**

- 720 **treated HIV infection (vol 199, pg 1177, 2009). *Journal of Infectious Diseases* 2009,**  
721 **200:160-160.**
- 722 28. Klatt NR, Funderburg NT, Brenchley JM: **Microbial translocation, immune activation,**  
723 **and HIV disease. *Trends in Microbiology* 2013, 21:6-13.**
- 724 29. Zevin AS, McKinnon L, Burgener A, Klatt NR: **Microbial translocation and microbiome**  
725 **dysbiosis in HIV-associated immune activation. *Curr Opin HIV AIDS* 2016, 11:182-190.**
- 726 30. Guadalupe M, Reay E, Sankaran S, Prindiville T, Flamm J, McNeil A, Dandekar S: **Severe**  
727 **CD4+ T-Cell Depletion in Gut Lymphoid Tissue during Primary Human**  
728 **Immunodeficiency Virus Type 1 Infection and Substantial Delay in Restoration**  
729 **following Highly Active Antiretroviral Therapy. *Journal of Virology* 2003, 77:11708-**  
730 **11717.**
- 731 31. Mehandru S, Poles MA, Tenner-Racz K, Jean-Pierre P, Manuelli V, Lopez P, Shet A, Low  
732 A, Mohri H, Boden D, et al: **Lack of Mucosal Immune Reconstitution during Prolonged**  
733 **Treatment of Acute and Early HIV-1 Infection. *PLoS Medicine* 2006, 3:e484.**
- 734 32. Zeng M, Southern PJ, Reilly CS, Beilman GJ, Chipman JG, Schacker TW, Haase AT:  
735 **Lymphoid tissue damage in HIV-1 infection depletes naive T cells and limits T cell**  
736 **reconstitution after antiretroviral therapy. *PLoS Pathog* 2012, 8:e1002437.**
- 737 33. Deleage C, Schuetz A, Alvord WG, Johnston L, Hao XP, Morcock DR, Rerknimitr R,  
738 Fletcher JL, Puttamaswin S, Phanuphak N, et al: **Impact of early cART in the gut during**  
739 **acute HIV infection. *JCI Insight* 2016, 1.**
- 740 34. Loiseau C, Requena M, Mavigner M, Cazabat M, Carrere N, Suc B, Barange K, Alric L,  
741 Marchou B, Massip P, et al: **CCR6(-) regulatory T cells blunt the restoration of gut Th17**  
742 **cells along the CCR6-CCL20 axis in treated HIV-1-infected individuals. *Mucosal Immunol***  
743 **2016, 9:1137-1150.**
- 744 35. Chung CY, Aiden SL, Funderburg NT, Fu P, Levine AD: **Progressive proximal-to-distal**  
745 **reduction in expression of the tight junction complex in colonic epithelium of virally-**  
746 **suppressed HIV+ individuals. *PLoS Pathog* 2014, 10:e1004198.**
- 747 36. Neuhaus J, Jacobs JDR, Baker JV, Calmy A, Duprez D, La Rosa A, Kuller LH, Pett SL, Ristola  
748 M, Ross MJ, et al: **Markers of Inflammation, Coagulation, and Renal Function Are**  
749 **Elevated in Adults with HIV Infection. *The Journal of Infectious Diseases* 2010,**  
750 **201:1788-1795.**
- 751 37. Tenorio AR, Zheng Y, Bosch RJ, Krishnan S, Rodriguez B, Hunt PW, Plants J, Seth A,  
752 Wilson CC, Deeks SG, et al: **Soluble Markers of Inflammation and Coagulation but Not**  
753 **T-Cell Activation Predict Non-AIDS-Defining Morbid Events During Suppressive**  
754 **Antiretroviral Treatment. *The Journal of Infectious Diseases* 2014, 210:1248-1259.**
- 755 38. De Pablo-Bernal RS, Ruiz-Mateos E, Rosado I, Dominguez-Molina B, Alvarez-Rios AI,  
756 Carrillo-Vico A, De La Rosa R, Delgado J, Munoz-Fernandez MA, Leal M, Ferrando-  
757 Martinez S: **TNF-alpha levels in HIV-infected patients after long-term suppressive cART**  
758 **persist as high as in elderly, HIV-uninfected subjects. *J Antimicrob Chemother* 2014,**  
759 **69:3041-3046.**
- 760 39. Duprez DA, Neuhaus J, Kuller LH, Tracy R, Bellosso W, De Wit S, Drummond F, Lane HC,  
761 Ledergerber B, Lundgren J, et al: **Inflammation, coagulation and cardiovascular disease**  
762 **in HIV-infected individuals. *PLoS One* 2012, 7:e44454.**

- 763 40. Coghill AE, Shiels MS, Suneja G, Engels EA: **Elevated Cancer-Specific Mortality Among**  
764 **HIV-Infected Patients in the United States.** *J Clin Oncol* 2015, **33**:2376-2383.
- 765 41. Saylor D, Dickens AM, Sacktor N, Haughey N, Slusher B, Pletnikov M, Mankowski JL,  
766 Brown A, Volsky DJ, McArthur JC: **HIV-associated neurocognitive disorder -**  
767 **pathogenesis and prospects for treatment.** *Nat Rev Neurol* 2016, **12**:309.
- 768 42. Brenchley JM, Price DA, Schacker TW, Asher TE, Silvestri G, Rao S, Kazzaz Z, Bornstein E,  
769 Lambotte O, Altmann D, et al: **Microbial translocation is a cause of systemic immune**  
770 **activation in chronic HIV infection.** *Nature Medicine* 2006, **12**:1365.
- 771 43. Jiang W, Lederman MM, Hunt P, Sieg SF, Haley K, Rodriguez B, Landay A, Martin J,  
772 Sinclair E, Asher AI, et al: **Plasma Levels of Bacterial DNA Correlate with Immune**  
773 **Activation and the Magnitude of Immune Restoration in Persons with Antiretroviral-**  
774 **Treated HIV Infection.** *The Journal of Infectious Diseases* 2009, **199**:1177-1185.
- 775 44. Collaboration TATC: **Life expectancy of individuals on combination antiretroviral**  
776 **therapy in high-income countries: a collaborative analysis of 14 cohort studies.** *The*  
777 *Lancet* 2008, **372**:293-299.
- 778 45. Guaraldi G, Orlando G, Zona S, Menozzi M, Carli F, Garlassi E, Berti A, Rossi E, Roverato  
779 A, Palella F: **Premature Age-Related Comorbidities Among HIV-Infected Persons**  
780 **Compared With the General Population.** *Clinical Infectious Diseases* 2011, **53**:1120-  
781 1126.
- 782 46. Simpson-Abelson MR, Sonnenberg GF, Takita H, Yokota SJ, Conway TF, Kelleher RJ,  
783 Shultz LD, Barcos M, Bankert RB: **Long-term engraftment and expansion of tumor-**  
784 **derived memory T cells following the implantation of non-disrupted pieces of human**  
785 **lung tumor into NOD-scid IL2R gamma(null) mice.** *Journal of Immunology* 2008,  
786 **180**:7009-7018.
- 787 47. Bankert RB, Balu-Iyer SV, Odunsi K, Shultz LD, Kelleher RJ, Barnas JL, Simpson-Abelson  
788 M, Parsons R, Yokota SJ: **Humanized Mouse Model of Ovarian Cancer Recapitulates**  
789 **Patient Solid Tumor Progression, Ascites Formation, and Metastasis.** *Plos One* 2011, **6**.
- 790 48. Vudattu NK, Waldron-Lynch F, Truman LA, Deng SY, Preston-Hurlburt P, Torres R,  
791 Raycroft MT, Mamula MJ, Herold KC: **Humanized Mice as a Model for Aberrant**  
792 **Responses in Human T Cell Immunotherapy.** *Journal of Immunology* 2014, **193**:587-596.
- 793 49. Whitfield-Larry F, Young EF, Talmage G, Fudge E, Azam A, Patel S, Largay J, Byrd W, Buse  
794 J, Calikoglu AS, et al: **HLA-A2 Matched Peripheral Blood Mononuclear Cells From Type 1**  
795 **Diabetic Patients, but Not Nondiabetic Donors, Transfer Insulinitis to NOD-scid/gamma**  
796 **c(null)/HLA-A2 Transgenic Mice Concurrent With the Expansion of Islet-Specific CD8(+)**  
797 **T cells.** *Diabetes* 2011, **60**:1726-1733.
- 798 50. Yi GH, Xu XQ, Abraham S, Petersen S, Guo H, Ortega N, Shankar P, Manjunath N: **A DNA**  
799 **Vaccine Protects Human Immune Cells against Zika Virus Infection in Humanized Mice.**  
800 *Ebiomedicine* 2017, **25**:87-94.
- 801 51. Stary G, Olive A, Radovic-Moreno AF, Gondek D, Alvarez D, Basto PA, Perro M, Vrbanac  
802 VD, Tager AM, Shi JJ, et al: **A mucosal vaccine against Chlamydia trachomatis generates**  
803 **two waves of protective memory T cells.** *Science* 2015, **348**.
- 804 52. Sun ZF, Denton PW, Estes JD, Othieno FA, Wei BL, Wege AK, Melkus MW, Padgett-  
805 Thomas A, Zupancic M, Haase AT, Garcia JV: **Intrarectal transmission, systemic**

- 806 **infection, and CD4(+) T cell depletion in humanized mice infected with HIV-1.** *Journal*  
807 *of Experimental Medicine* 2007, **204**:705-714.
- 808 53. Wang LX, Kang GB, Kumar P, Lu WX, Li Y, Zhou Y, Li QS, Wood C: **Humanized-BLT mouse**  
809 **model of Kaposi's sarcoma-associated herpesvirus infection.** *Proceedings of the*  
810 *National Academy of Sciences of the United States of America* 2014, **111**:3146-3151.
- 811 54. Ernst W: **Humanized mice in infectious diseases.** *Comparative Immunology*  
812 *Microbiology and Infectious Diseases* 2016, **49**:29-38.
- 813 55. Xiao L, Feng Q, Liang SS, Sonne SB, Xia ZK, Qiu XM, Li XP, Long H, Zhang JF, Zhang DY, et  
814 al: **A catalog of the mouse gut metagenome.** *Nature Biotechnology* 2015, **33**:1103-+.
- 815 56. Nguyen TLA, Vieira-Silva S, Liston A, Raes J: **How informative is the mouse for human**  
816 **gut microbiota research?** *Disease Models & Mechanisms* 2015, **8**:1-16.
- 817 57. Daharsh L ZJ, Ramer-Tait A, Li Q: **A Double Humanized BLT-mice Model Featuring a**  
818 **Stable Human-Like Gut Microbiome and Human Immune System.** *Jove-Journal of*  
819 *Visualized Experiments* 2019.
- 820 58. Daharsh L, Zhang J, Ramer-Tait A, Li Q: **A Double Humanized BLT-mice Model Featuring**  
821 **a Stable Human-Like Gut Microbiome and Human Immune System.** *J Vis Exp* 2019.
- 822 59. Brainard DM, Seung E, Frahm N, Cariappa A, Bailey CC, Hart WK, Shin HS, Brooks SF,  
823 Knight HL, Eichbaum Q, et al: **Induction of Robust Cellular and Humoral Virus-Specific**  
824 **Adaptive Immune Responses in Human Immunodeficiency Virus-Infected Humanized**  
825 **BLT Mice.** *Journal of Virology* 2009, **83**:7305-7321.
- 826 60. Li QS, Tso FY, Kang GB, Lu WX, Li Y, Fan WJ, Yuan Z, Destache CJ, Wood C: **Early Initiation**  
827 **of Antiretroviral Therapy Can Functionally Control Productive HIV-1 Infection in**  
828 **Humanized-BLT Mice.** *AIDS-Journal of Acquired Immune Deficiency Syndromes* 2015,  
829 **69**:519-527.
- 830 61. Destache CJ, Mandal S, Yuan Z, Kang G, Date AA, Lu W, Shibata A, Pham R, Bruck P,  
831 Rezich M, et al: **Topical Tenofovir Disoproxil Fumarate Nanoparticles Prevent HIV-1**  
832 **Vaginal Transmission in a Humanized Mouse Model.** *Antimicrob Agents Chemother*  
833 2016, **60**:3633-3639.
- 834 62. Chateau ML, Denton PW, Swanson MD, McGowan I, Garcia JV: **Rectal transmission of**  
835 **transmitted/founder HIV-1 is efficiently prevented by topical 1% tenofovir in BLT**  
836 **humanized mice.** *PLoS One* 2013, **8**:e60024.
- 837 63. Daharsh L, Ramer-Tait AE, Li Q: **Stable Engraftment of a Human Gut Bacterial**  
838 **Microbiome in Double Humanized BLT-mice.** *bioRxiv* 2019:749093.
- 839 64. Yuan Z, Kang G, Ma F, Lu W, Fan W, Fennessey CM, Keele BF, Li Q: **Recapitulating Cross-**  
840 **Species Transmission of Simian Immunodeficiency Virus SIVcpz to Humans by Using**  
841 **Humanized BLT Mice.** *J Virol* 2016, **90**:7728-7739.
- 842 65. Taha TE, Hoover DR, Dallabetta GA, Kumwenda NI, Mtimavalye LA, Yang LP, Liomba GN,  
843 Broadhead RL, Chipangwi JD, Miotti PG: **Bacterial vaginosis and disturbances of**  
844 **vaginal flora: association with increased acquisition of HIV.** *AIDS* 1998, **12**:1699-1706.
- 845 66. Gosmann C, Anahtar MN, Handley SA, Farcasanu M, Abu-Ali G, Bowman BA, Padavattan  
846 N, Desai C, Droit L, Moodley A, et al: **Lactobacillus-Deficient Cervicovaginal Bacterial**  
847 **Communities Are Associated with Increased HIV Acquisition in Young South African**  
848 **Women.** *Immunity* 2017, **46**:29-37.

- 849 67. McClelland RS, Lingappa JR, Srinivasan S, Kinuthia J, John-Stewart GC, Jaoko W,  
850 Richardson BA, Yuhas K, Fiedler TL, Mandaliya KN, et al: **Evaluation of the association**  
851 **between the concentrations of key vaginal bacteria and the increased risk of HIV**  
852 **acquisition in African women from five cohorts: a nested case-control study.** *Lancet*  
853 *Infect Dis* 2018, **18**:554-564.
- 854 68. Shang Q, Song G, Zhang M, Shi J, Xu C, Hao J, Li G, Yu G: **Dietary fucoidan improves**  
855 **metabolic syndrome in association with increased Akkermansia population in the gut**  
856 **microbiota of high-fat diet-fed mice.** *Journal of Functional Foods* 2017, **28**:138-146.
- 857 69. Brown K, DeCoffe D, Molcan E, Gibson DL: **Diet-induced dysbiosis of the intestinal**  
858 **microbiota and the effects on immunity and disease.** *Nutrients* 2012, **4**:1095-1119.
- 859 70. Kuller LH, Tracy R, Belloso W, De Wit S, Drummond F, Lane HC, Ledergerber B, Lundgren  
860 J, Neuhaus J, Nixon D, et al: **Inflammatory and Coagulation Biomarkers and Mortality in**  
861 **Patients with HIV Infection.** *Plos Medicine* 2008, **5**:1496-1508.
- 862 71. Neuhaus J, Jacobs DR, Baker JV, Calmy A, Duprez D, La Rosa A, Kuller LH, Pett SL, Ristola  
863 M, Ross MJ, et al: **Markers of Inflammation, Coagulation, and Renal Function Are**  
864 **Elevated in Adults with HIV Infection.** *Journal of Infectious Diseases* 2010, **201**:1788-  
865 1795.
- 866 72. Dillon SM, Lee EJ, Kotter CV, Austin GL, Dong Z, Hecht DK, Gianella S, Siewe B, Smith DM,  
867 Landay AL, et al: **An altered intestinal mucosal microbiome in HIV-1 infection is**  
868 **associated with mucosal and systemic immune activation and endotoxemia.** *Mucosal*  
869 *Immunol* 2014, **7**:983-994.
- 870 73. Dubourg G, Lagier JC, Hue S, Surenaud M, Bachar D, Robert C, Michelle C, Ravaux I,  
871 Mokhtari S, Million M, et al: **Gut microbiota associated with HIV infection is**  
872 **significantly enriched in bacteria tolerant to oxygen.** *BMJ Open Gastroenterol* 2016,  
873 **3**:e000080.
- 874 74. Guillen Y, Noguera-Julian M, Rivera J, Casadella M, Zevin AS, Rocafort M, Parera M,  
875 Rodriguez C, Arumi M, Carrillo J, et al: **Low nadir CD4+ T-cell counts predict gut**  
876 **dysbiosis in HIV-1 infection.** *Mucosal Immunol* 2019, **12**:232-246.
- 877 75. Lee SC, Chua LL, Yap SH, Khang TF, Leng CY, Raja Azwa RI, Lewin SR, Kamarulzaman A,  
878 Woo YL, Lim YAL, et al: **Enrichment of gut-derived Fusobacterium is associated with**  
879 **suboptimal immune recovery in HIV-infected individuals.** *Sci Rep* 2018, **8**:14277.
- 880 76. Ling Z, Jin C, Xie T, Cheng Y, Li L, Wu N: **Alterations in the Fecal Microbiota of Patients**  
881 **with HIV-1 Infection: An Observational Study in A Chinese Population.** *Sci Rep* 2016,  
882 **6**:30673.
- 883 77. Lozupone CA, Rhodes ME, Neff CP, Fontenot AP, Campbell TB, Palmer BE: **HIV-induced**  
884 **alteration in gut microbiota: driving factors, consequences, and effects of**  
885 **antiretroviral therapy.** *Gut Microbes* 2014, **5**:562-570.
- 886 78. Lu W, Feng Y, Jing F, Han Y, Lyu N, Liu F, Li J, Song X, Xie J, Qiu Z, et al: **Association**  
887 **Between Gut Microbiota and CD4 Recovery in HIV-1 Infected Patients.** *Front Microbiol*  
888 2018, **9**:1451.
- 889 79. McHardy IH, Li X, Tong M, Ruegger P, Jacobs J, Borneman J, Anton P, Braun J: **HIV**  
890 **Infection is associated with compositional and functional shifts in the rectal mucosal**  
891 **microbiota.** *Microbiome* 2013, **1**:26.

- 892 80. Monaco CL, Gootenberg DB, Zhao G, Handley SA, Ghebremichael MS, Lim ES, Lankowski  
893 A, Baldrige MT, Wilen CB, Flagg M, et al: **Altered Virome and Bacterial Microbiome in**  
894 **Human Immunodeficiency Virus-Associated Acquired Immunodeficiency Syndrome.**  
895 *Cell Host Microbe* 2016, **19**:311-322.
- 896 81. Mutlu EA, Keshavarzian A, Losurdo J, Swanson G, Siewe B, Forsyth C, French A, Demarais  
897 P, Sun Y, Koenig L, et al: **A compositional look at the human gastrointestinal**  
898 **microbiome and immune activation parameters in HIV infected subjects.** *PLoS Pathog*  
899 2014, **10**:e1003829.
- 900 82. Nowak P, Troseid M, Avershina E, Barqasho B, Neogi U, Holm K, Hov JR, Noyan K,  
901 Vesterbacka J, Svard J, et al: **Gut microbiota diversity predicts immune status in HIV-1**  
902 **infection.** *AIDS* 2015, **29**:2409-2418.
- 903 83. Rocafort M, Noguera-Julian M, Rivera J, Pastor L, Guillen Y, Langhorst J, Parera M,  
904 Mandomando I, Carrillo J, Urrea V, et al: **Evolution of the gut microbiome following**  
905 **acute HIV-1 infection.** *Microbiome* 2019, **7**:73.
- 906 84. San-Juan-Vergara H, Zurek E, Ajami NJ, Mogollon C, Pena M, Portnoy I, Velez JI, Cadena-  
907 Cruz C, Diaz-Olmos Y, Hurtado-Gomez L, et al: **A Lachnospiraceae-dominated bacterial**  
908 **signature in the fecal microbiota of HIV-infected individuals from Colombia, South**  
909 **America.** *Scientific Reports* 2018, **8**.
- 910 85. Sun Y, Ma Y, Lin P, Tang YW, Yang L, Shen Y, Zhang R, Liu L, Cheng J, Shao J, et al: **Fecal**  
911 **bacterial microbiome diversity in chronic HIV-infected patients in China.** *Emerg*  
912 *Microbes Infect* 2016, **5**:e31.
- 913 86. Vazquez-Castellanos JF, Serrano-Villar S, Latorre A, Artacho A, Ferrus ML, Madrid N,  
914 Vallejo A, Sainz T, Martinez-Botas J, Ferrando-Martinez S, et al: **Altered metabolism of**  
915 **gut microbiota contributes to chronic immune activation in HIV-infected individuals.**  
916 *Mucosal Immunol* 2015, **8**:760-772.
- 917 87. Vesterbacka J, Rivera J, Noyan K, Parera M, Neogi U, Calle M, Paredes R, Sonnerborg A,  
918 Noguera-Julian M, Nowak P: **Richer gut microbiota with distinct metabolic profile in**  
919 **HIV infected Elite Controllers.** *Scientific Reports* 2017, **7**.
- 920 88. Yang L, Poles MA, Fisch GS, Ma Y, Nossa C, Phelan JA, Pei Z: **HIV-induced**  
921 **immunosuppression is associated with colonization of the proximal gut by**  
922 **environmental bacteria.** *AIDS* 2016, **30**:19-29.
- 923 89. Yu G, Fadrosch D, Ma B, Ravel J, Goedert JJ: **Anal microbiota profiles in HIV-positive and**  
924 **HIV-negative MSM.** *AIDS* 2014, **28**:753-760.
- 925 90. Zhou Y, Ou Z, Tang X, Zhou Y, Xu H, Wang X, Li K, He J, Du Y, Wang H, et al: **Alterations in**  
926 **the gut microbiota of patients with acquired immune deficiency syndrome.** *J Cell Mol*  
927 *Med* 2018, **22**:2263-2271.
- 928 91. Gori A, Tincati C, Rizzardini G, Torti C, Quirino T, Haarman M, Ben Amor K, van Schaik J,  
929 Vriesema A, Knol J, et al: **Early impairment of gut function and gut flora supporting a**  
930 **role for alteration of gastrointestinal mucosa in human immunodeficiency virus**  
931 **pathogenesis.** *J Clin Microbiol* 2008, **46**:757-758.
- 932 92. Ellis CL, Ma ZM, Mann SK, Li CS, Wu J, Knight TH, Yotter T, Hayes TL, Maniar AH, Troia-  
933 Cancio PV, et al: **Molecular characterization of stool microbiota in HIV-infected**  
934 **subjects by panbacterial and order-level 16S ribosomal DNA (rDNA) quantification and**  
935 **correlations with immune activation.** *J Acquir Immune Defic Syndr* 2011, **57**:363-370.



- 936 93. Vujkovic-Cvijin I, Somsouk M: **HIV and the Gut Microbiota: Composition,**  
937 **Consequences, and Avenues for Amelioration.** *Curr HIV/AIDS Rep* 2019, **16**:204-213.
- 938 94. Noguera-Julian M, Rocafort M, Guillen Y, Rivera J, Casadella M, Nowak P, Hildebrand F,  
939 Zeller G, Parera M, Bellido R, et al: **Gut Microbiota Linked to Sexual Preference and HIV**  
940 **Infection.** *EBioMedicine* 2016, **5**:135-146.
- 941 95. Kelley CF, Kraft CS, de Man TJB, Duphare C, Lee HW, Yang J, Easley KA, Tharp GK,  
942 Mulligan MJ, Sullivan PS, et al: **The rectal mucosa and condomless receptive anal**  
943 **intercourse in HIV-negative MSM: implications for HIV transmission and prevention.**  
944 *Mucosal Immunology* 2017, **10**:996-1007.
- 945 96. Armstrong AJ, Shaffer M, Nusbacher NM, Griesmer C, Fiorillo S, Schneider JM, Neff CP, Li  
946 SX, Fontenot AP, Campbell T: **An exploration of Prevotella-rich microbiomes in HIV and**  
947 **men who have sex with men.** *bioRxiv* 2018:424291.
- 948 97. McKenna P, Hoffmann C, Minkah N, Aye PP, Lackner A, Liu Z, Lozupone CA, Hamady M,  
949 Knight R, Bushman FD: **The macaque gut microbiome in health, lentiviral infection, and**  
950 **chronic enterocolitis.** *PLoS Pathog* 2008, **4**:e20.
- 951 98. Handley SA, Desai C, Zhao G, Droit L, Monaco CL, Schroeder AC, Nkolola JP, Norman ME,  
952 Miller AD, Wang D, et al: **SIV Infection-Mediated Changes in Gastrointestinal Bacterial**  
953 **Microbiome and Virome Are Associated with Immunodeficiency and Prevented by**  
954 **Vaccination.** *Cell Host Microbe* 2016, **19**:323-335.
- 955 99. Glavan TW, Gaulke CA, Rocha CS, Sankaran-Walters S, Hirao LA, Raffatellu M, Jiang G,  
956 Baumler AJ, Goulart LR, Dandekar S: **Gut immune dysfunction through impaired innate**  
957 **pattern recognition receptor expression and gut microbiota dysbiosis in chronic SIV**  
958 **infection.** *Mucosal Immunology* 2016, **9**:677-688.
- 959 100. Martinez I, Wallace G, Zhang C, Legge R, Benson AK, Carr TP, Moriyama EN, Walter J:  
960 **Diet-induced metabolic improvements in a hamster model of hypercholesterolemia**  
961 **are strongly linked to alterations of the gut microbiota.** *Appl Environ Microbiol* 2009,  
962 **75**:4175-4184.
- 963 101. Callahan BJ, McMurdie PJ, Rosen MJ, Han AW, Johnson AJ, Holmes SP: **DADA2: High-**  
964 **resolution sample inference from Illumina amplicon data.** *Nat Methods* 2016, **13**:581-  
965 583.
- 966 102. Wang Q, Garrity GM, Tiedje JM, Cole JR: **Naive Bayesian classifier for rapid assignment**  
967 **of rRNA sequences into the new bacterial taxonomy.** *Applied and Environmental*  
968 *Microbiology* 2007, **73**:5261-5267.
- 969 103. Caporaso JG, Kuczynski J, Stombaugh J, Bittinger K, Bushman FD, Costello EK, Fierer N,  
970 Pena AG, Goodrich JK, Gordon JI, et al: **QIIME allows analysis of high-throughput**  
971 **community sequencing data.** *Nature Methods* 2010, **7**:335-336.
- 972

973

## 974 **Figure Legends**

975 **Figure 1. HIV-1 infected double hu-mice had a significantly different gut microbiome composition**

976 **compared to uninfected double hu-mice.** Non-metric multidimensional scaling (NMDS) and Principal

977 coordinate analysis (PCoA) plots AB) Clustering of post fecal material transplant (Post-FMT), HIV-1  
978 infected (Infected) and uninfected (Uninfected) double humanized mice gut microbiome profiles. CD)  
979 Clustering of post fecal material transplant (Post-FMT), HIV-1 infected (Infected) and uninfected  
980 (Uninfected) double humanized mice gut microbiome profiles based on sample collection date. EF)  
981 Clustering of post fecal material transplant (Post-FMT), HIV-1 infected (Infected) and uninfected  
982 (Uninfected) double humanized mice gut microbiome profiles based on body weight on collection date.  
983

984 **Figure 2. HIV-1 infected double hu-mice had a significantly different gut microbiome composition**  
985 **compared to uninfected double hu-mice.** Gut microbiome profiles for humanized mice before receiving  
986 antibiotic treatment and subsequent fecal material transplants (Pre-treatment), double humanized mice  
987 post fecal material transplant (Post-FMT), HIV-1 infected double humanized mice (Infected) and  
988 uninfected double humanized mice (Uninfected), and human donor fecal samples (Donor) A) Gut  
989 microbiome profiles displayed by Non-metric multidimensional scaling (NMDS). B) Gut microbiome  
990 profiles displayed by Principal coordinate analysis (PCoA). C) Alpha diversity of gut microbiome profiles  
991 shown by species richness. D) Alpha diversity of gut microbiome profiles shown by Shannon Index. E)  
992 Alpha diversity of gut microbiome profiles shown by Simpson Index. F) Taxa abundance plot of gut  
993 microbiome profiles by Order level. G) Taxa abundance plot of gut microbiome profiles by Family level.  
994

995 **Figure 3. HIV-1 infected double hu-mice had increased systemic human inflammatory cytokines.**  
996 Human inflammatory cytokine measures from plasma of double humanized mice. Samples were collected  
997 from double humanized mice at 7 and 12 weeks post infection (WPI). Cytokine levels shown by mean  
998 fluorescence intensity (MFI). A) IL-1 $\beta$  B) IL-6 C) IFN- $\gamma$  D) TNF- $\alpha$ .

999 **Figure 4. HIV-1 infected double hu-mice had increased systemic human immune cell activation.** A)  
1000 Human immune cell populations from peripheral blood of double humanized mice up to 12 weeks post  
1001 HIV-1 infection. All immune populations were lymphocyte+, human CD45+ and mouse CD45-, and  
1002 human CD3+) and are represented by the percentage of their parent gate. B) Percentage of peripheral

1003 blood human immune cell populations shown as a mean for the longitudinally collected HIV-1 infected or  
1004 uninfected double humanized mice. For each population of human immune cells a multiple comparison  
1005 test for significance was performed between the sample groups (ANOVA with Tukey Test with adjusted  
1006 P values < 0.05).

1007

1008 **Figure 5. Diet significantly altered the gut microbiome of double hu-mice** A) Non-metric  
1009 multidimensional scaling (NMDS) plot displaying double humanized mice on a mouse chow diet, a high  
1010 fat diet, or a low fat diet. B) Principal coordinate analysis (PCoA) displaying double humanized mice on a  
1011 mouse chow diet, a high fat diet, or a low fat diet. C) Alpha diversity plot of species richness comparing  
1012 double humanized mice on a mouse chow diet, a high fat diet, or a low fat diet. D) Alpha diversity plot of  
1013 the Shannon index comparing double humanized mice on a mouse chow diet, a high fat diet, or a low fat  
1014 diet. E) Alpha diversity plot of the Simpson index comparing double humanized mice on a mouse chow  
1015 diet, a high fat diet, or a low fat diet. F) Taxa abundance plot by Order level comparing double humanized  
1016 mice on a mouse chow diet, a high fat diet, or a low fat diet. G) Taxa abundance plot by Family level  
1017 comparing double humanized mice on a mouse chow diet, a high fat diet, or a low fat diet.

1018

1019 **Figure 6. Double hu-mice fed a high fat diet had increased systemic human inflammatory cytokines.**  
1020 Human inflammatory cytokine measures from plasma of double humanized mice. Samples were collected  
1021 from double humanized mice 0.5, 1.5, and 3.5 weeks post low fat diet (LFD) or high fat diet (HFD)  
1022 initiation. Cytokine levels shown by mean fluorescence intensity (MFI). A) All samples IL-1 $\beta$  B)  
1023 Longitudinal IL-1 $\beta$  C) All samples IL-6 D) Longitudinal IL-6 E) All samples IFN- $\gamma$  F) Longitudinal IFN-  
1024  $\gamma$  G) All samples TNF- $\alpha$  H) Longitudinal TNF- $\alpha$ .

1025

1026 **Figure 7. Double hu-mice fed a high fat diet had increased systemic human immune cell activation.**

1027 A) Human immune cell populations from peripheral blood of double humanized mice up to 8 weeks on a

1028 regular mouse chow (Chow), low fat (LFD), or high fat diet (HFD). All immune populations were  
1029 lymphocyte+, human CD45+ and mouse CD45-, and human CD3+) and are represented by the percentage  
1030 of their parent gate. B) Percentage of peripheral blood human immune cell populations shown as a mean  
1031 for the longitudinally collected double humanized mice on a chow, LFD, or HFD. For each population of  
1032 human immune cells a multiple comparison test for significance was performed between the sample  
1033 groups (ANOVA with Tukey Test with adjusted P values < 0.05).

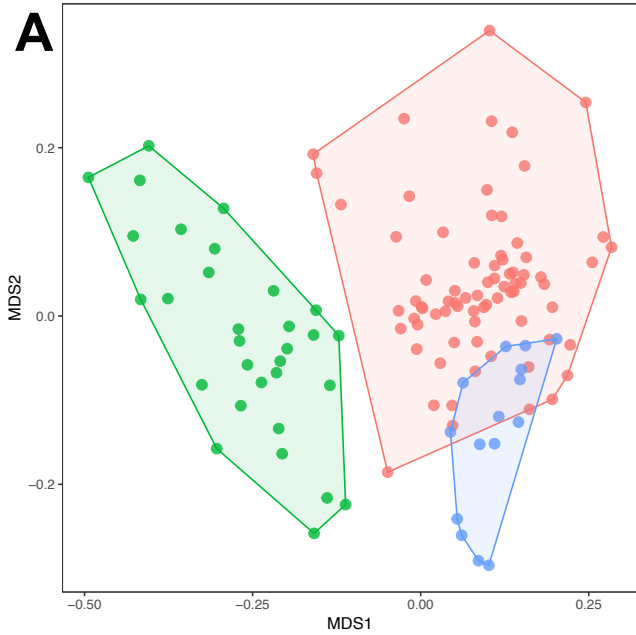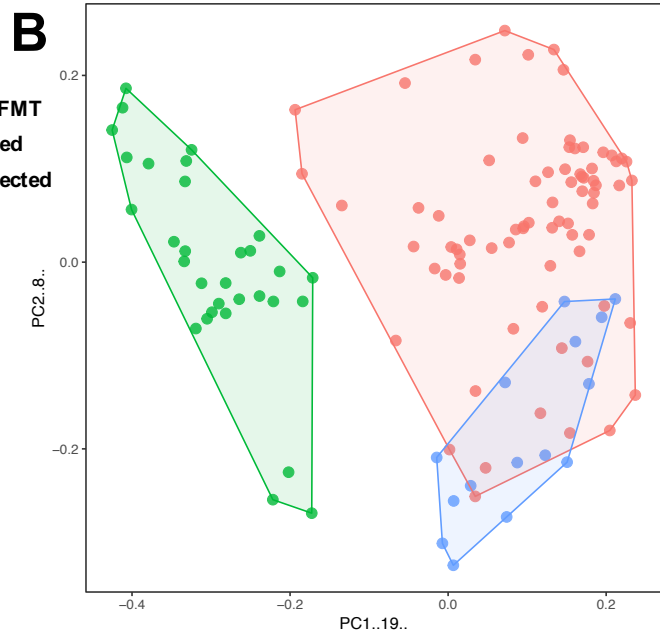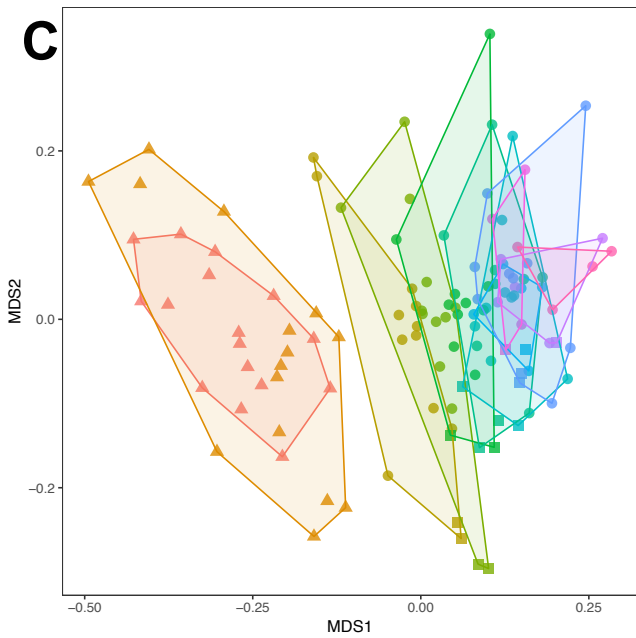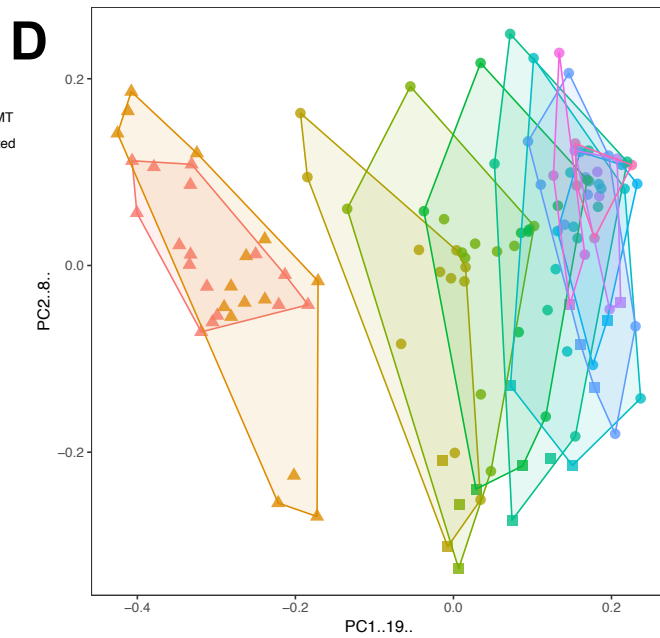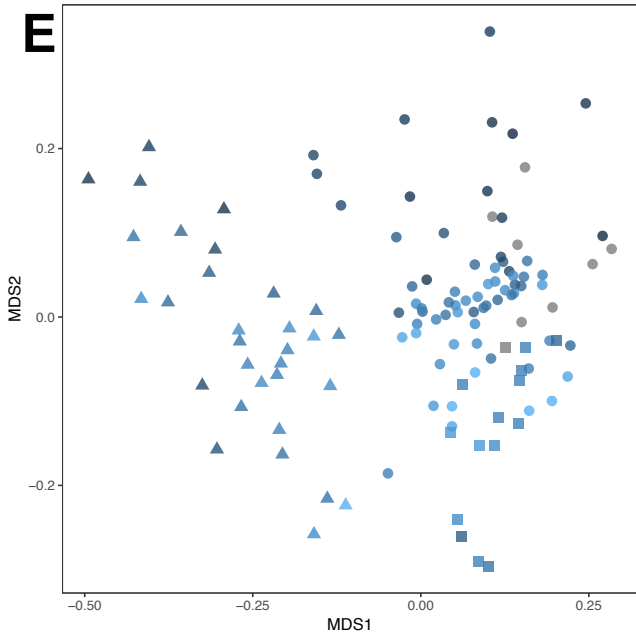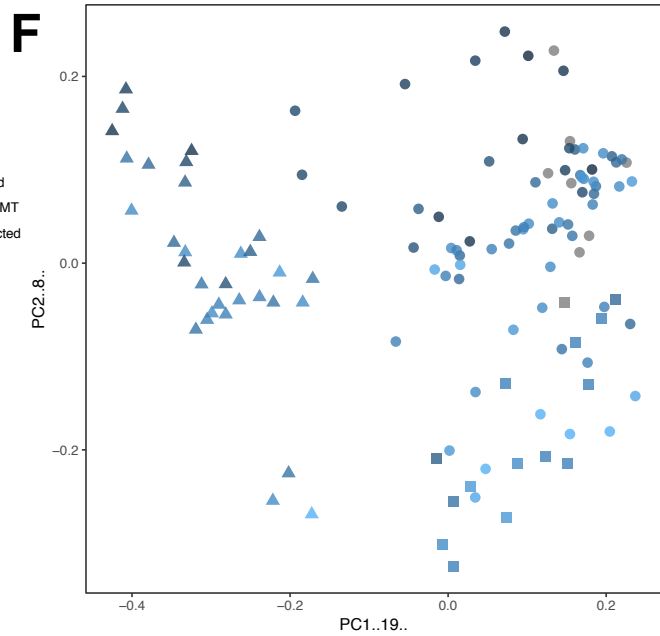

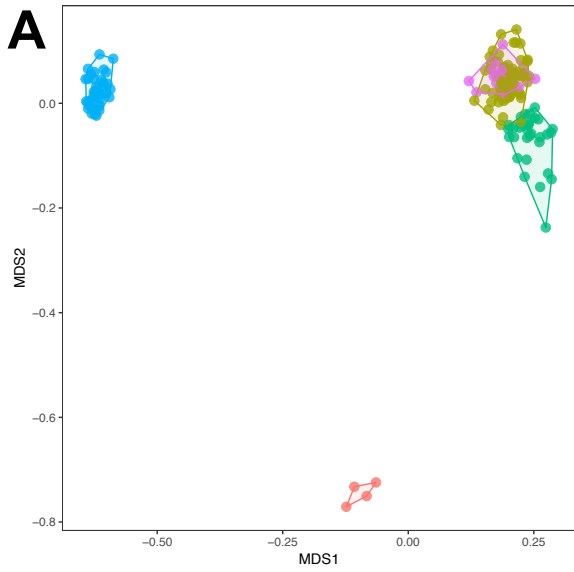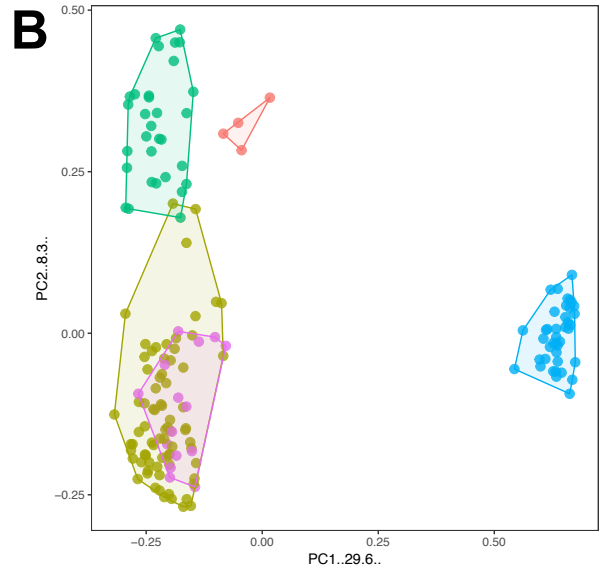

■ Pre-Treatment 
 ■ Post-FMT 
 ■ Uninfected 
 ■ Infected 
 ■ Donor

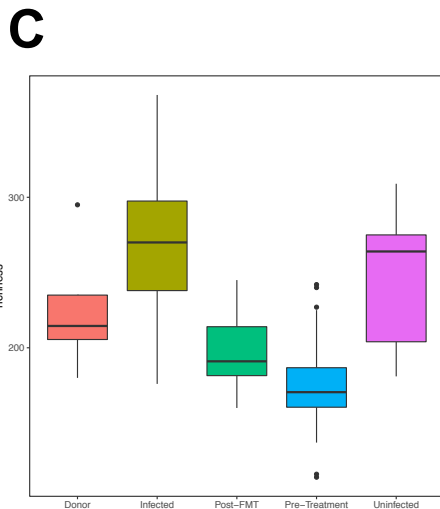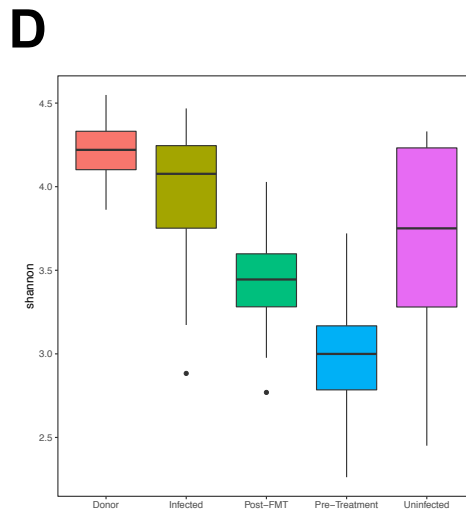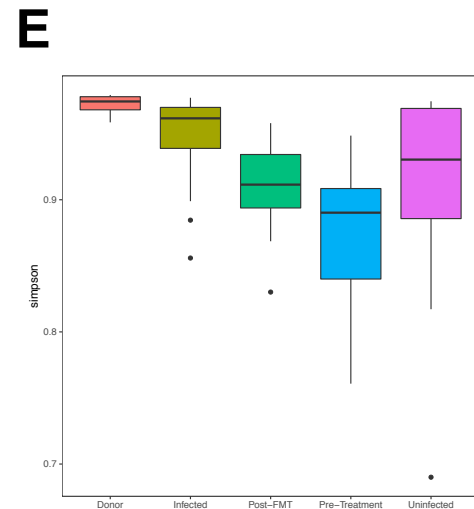

**F**

|               | o__Bacteroidales | o__Bifidobacteriales | o__Burkholderiales | o__Clostridiales | o__Erysipelotrichales | o__Lactobacillales | o__Turicibacterales | o__Verrucomicrobiales | Other |
|---------------|------------------|----------------------|--------------------|------------------|-----------------------|--------------------|---------------------|-----------------------|-------|
| Pre-Treatment | 18.2             | 8.5                  | 0                  | 23.8             | 2.5                   | 14.1               | 14.2                | 16.2                  | 2.5   |
| Post-FMT      | 24.3             | 1.2                  | 1.5                | 31.6             | 8.1                   | 3.6                | 5.4                 | 22.9                  | 1.5   |
| Uninfected    | 30.3             | 0                    | 2.2                | 26.7             | 1.8                   | 19.1               | 9                   | 9.1                   | 1.9   |
| Infected      | 34.9             | 7.1                  | 1.6                | 35.5             | 1.8                   | 3.5                | 5                   | 8.3                   | 2.4   |
| Donor         | 18.9             | 1.8                  | 1                  | 68.8             | 3.6                   | 1.4                | 0.2                 | 0.8                   | 3.5   |

**G**

|               | f__Alcaligenaceae | f__Bacteroidaceae | f__Bifidobacteriaceae | f__Clostridiaceae | f__Erysipelotrichaceae | f__Lachnospiraceae | f__Lactobacillaceae | f__Porphyromonadaceae | f__Rikenellaceae | f__Ruminococcaceae | f__S24-7 | f__Turicibacteraceae | f__Veillonellaceae | f__Verrucomicrobiaceae | Other |      |     |
|---------------|-------------------|-------------------|-----------------------|-------------------|------------------------|--------------------|---------------------|-----------------------|------------------|--------------------|----------|----------------------|--------------------|------------------------|-------|------|-----|
| Pre-Treatment | 3.5               | 4                 | 0                     | 0                 | 8.5                    | 3.5                | 2.5                 | 7.8                   | 13.9             | 0                  | 1.9      | 5                    | 16.3               | 14.2                   | 0     | 16.2 | 2.8 |
| Post-FMT      | 0.8               | 0.1               | 1.5                   | 20.8              | 1.2                    | 0.5                | 8.1                 | 19.7                  | 3.4              | 2.5                | 0.7      | 6                    | 0                  | 5.4                    | 3.1   | 22.9 | 3.4 |
| Uninfected    | 1.8               | 0.4               | 2.2                   | 24.9              | 0                      | 2.1                | 1.8                 | 9.2                   | 19               | 2.5                | 2.3      | 10.3                 | 0                  | 9                      | 1.8   | 9.1  | 3.7 |
| Infected      | 1.9               | 0.8               | 1.6                   | 27.8              | 7.1                    | 2.8                | 1.8                 | 11.3                  | 3.3              | 3.3                | 2.4      | 14.7                 | 0                  | 5                      | 2.4   | 8.3  | 5.4 |
| Donor         | 0.6               | 0.4               | 1                     | 16.8              | 1.8                    | 1.7                | 3.6                 | 38.6                  | 0                | 0.6                | 1.2      | 25                   | 0                  | 0.2                    | 2.4   | 0.8  | 5.3 |

**A****IL-1 $\beta$** 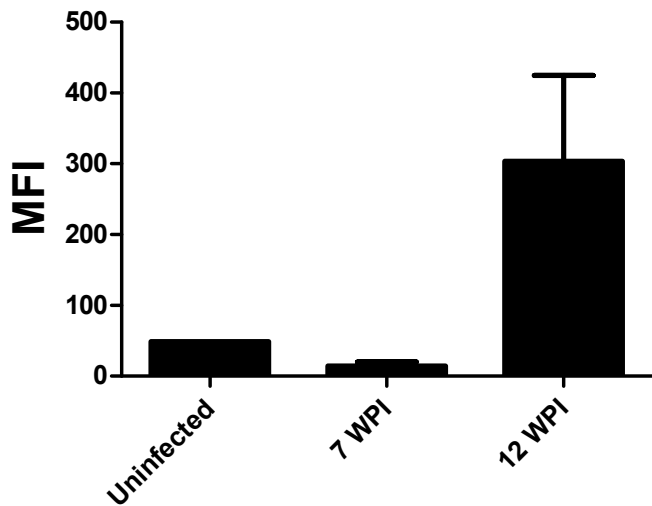**B****IL-6**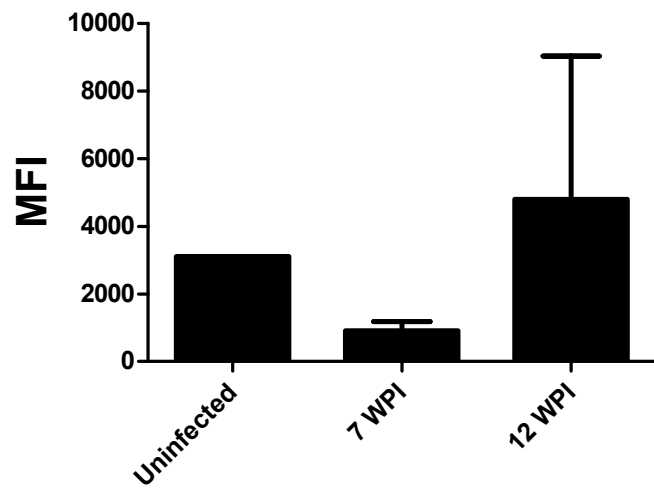**C****IFN- $\gamma$** 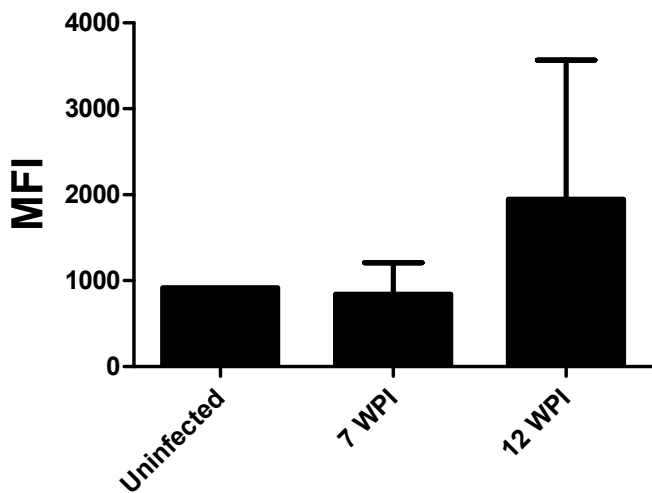**D****TNF- $\alpha$** 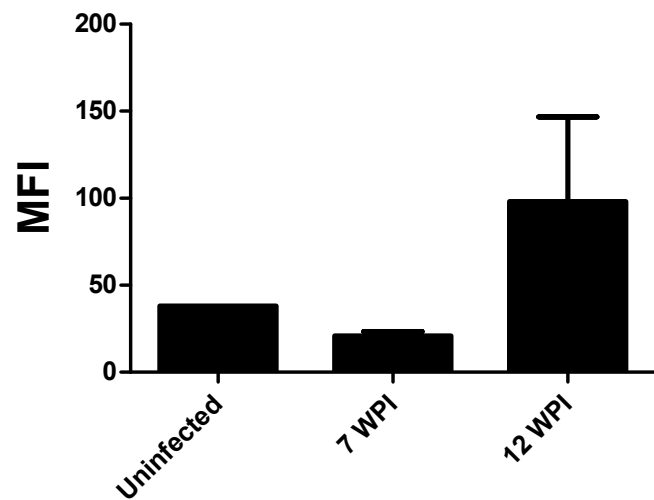

**A**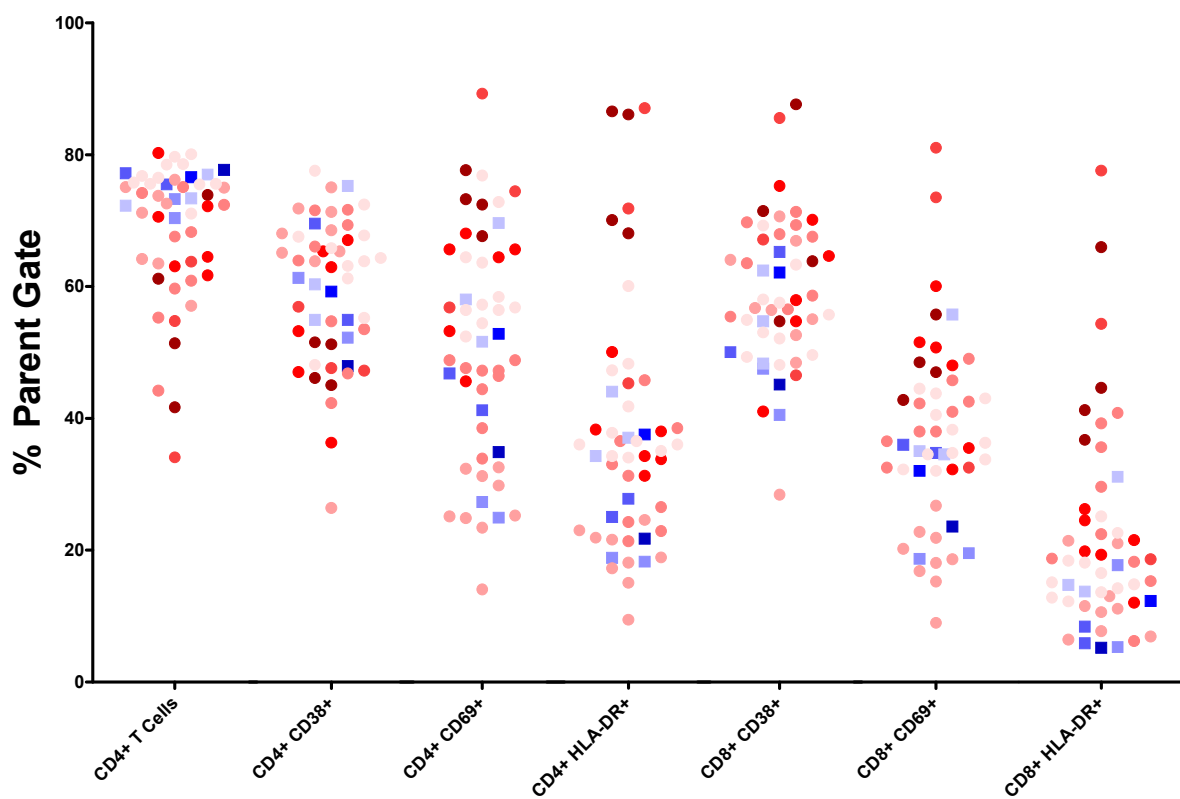**B**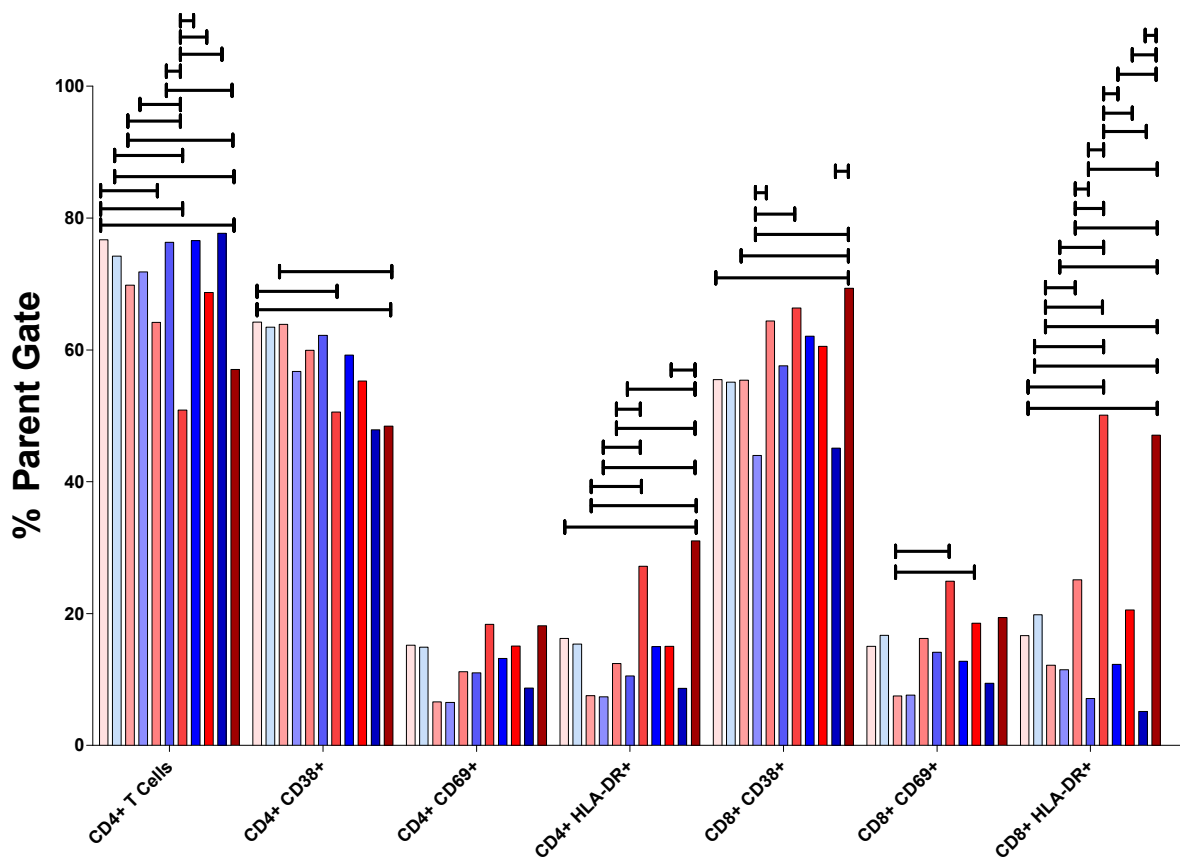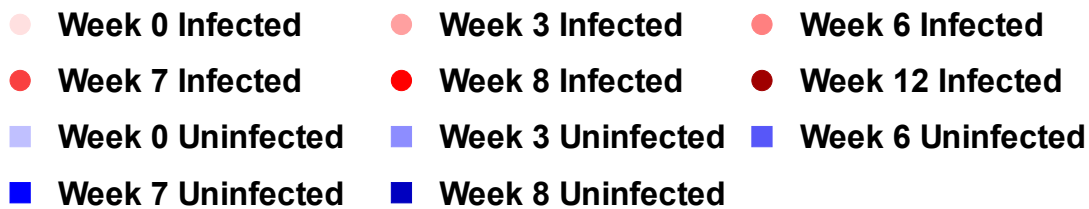



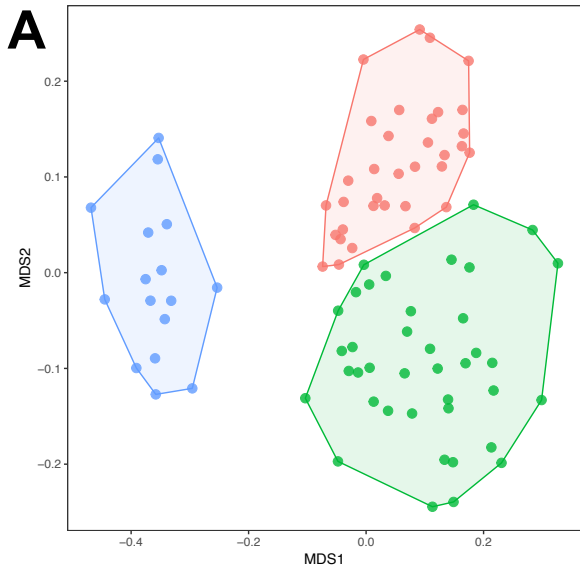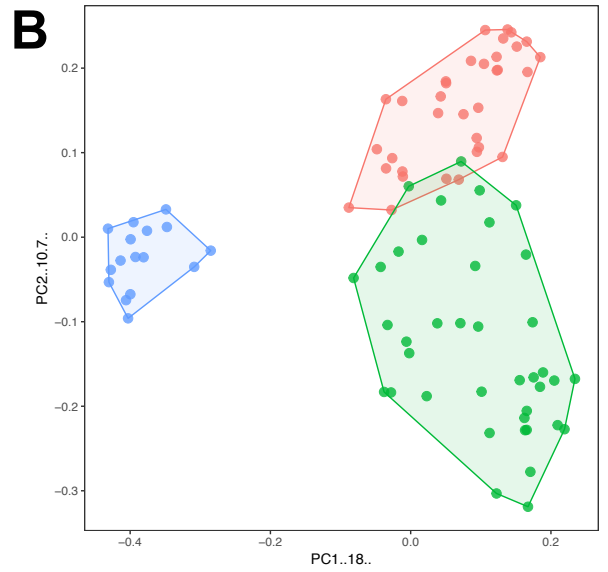

■ Post-FMT ■ LFD ■ HFD

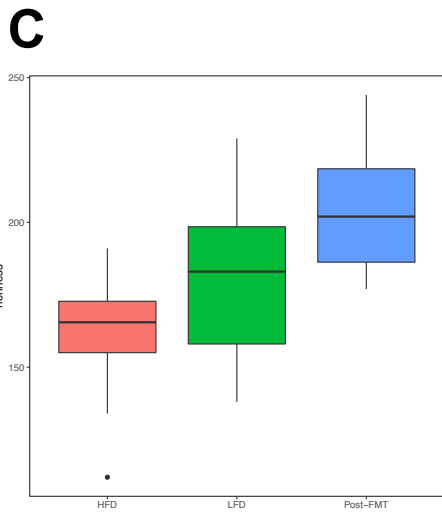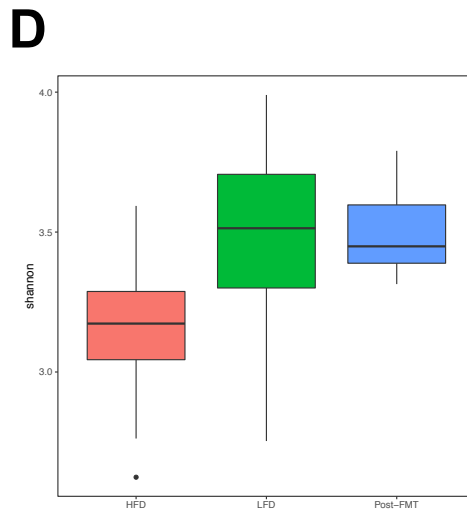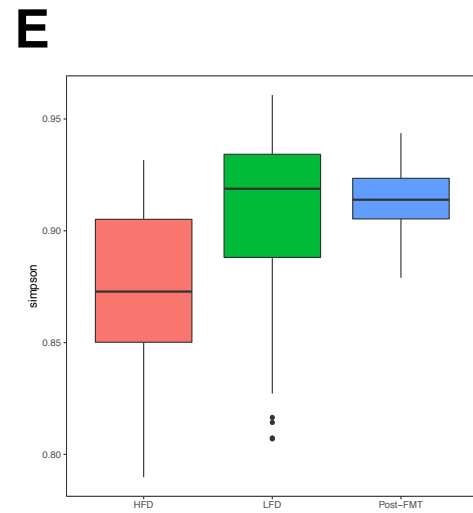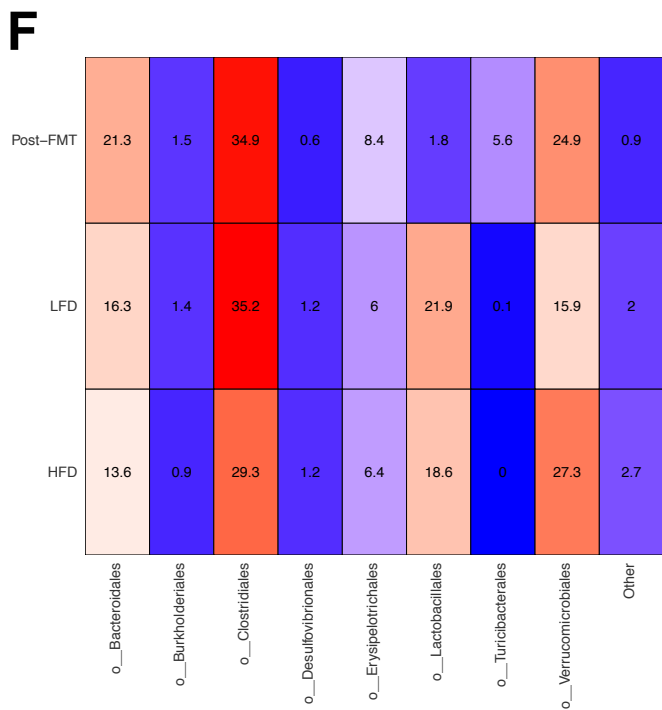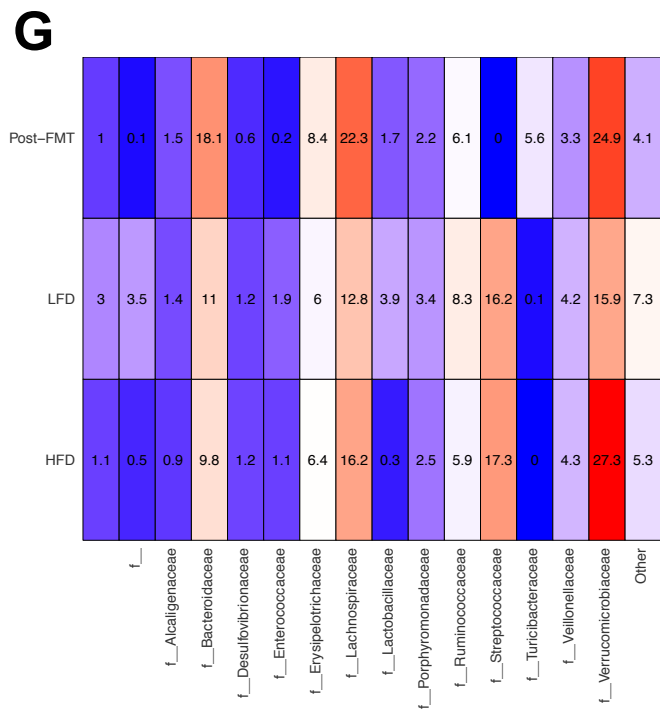

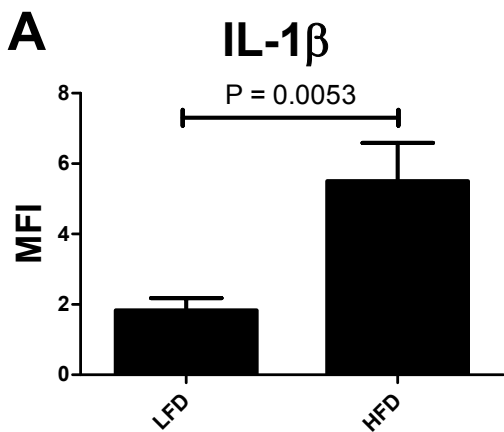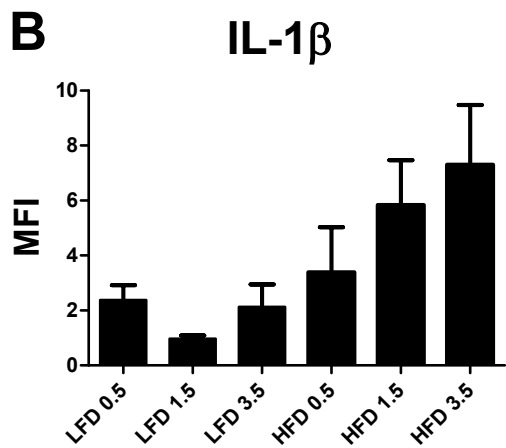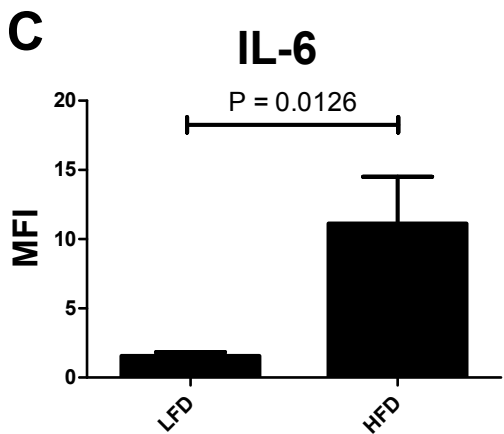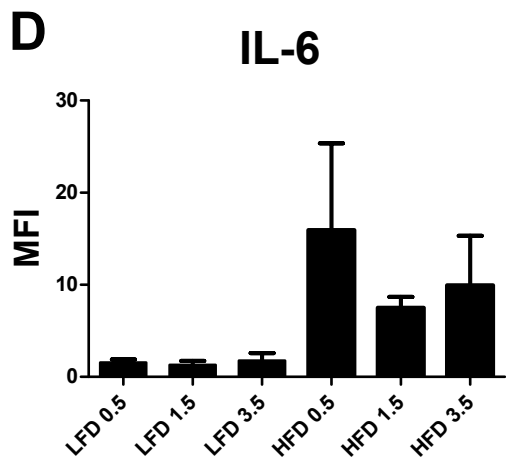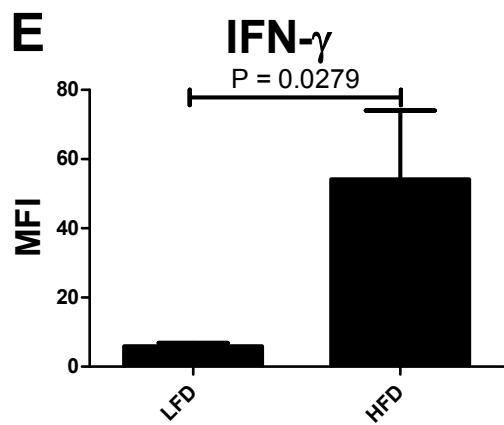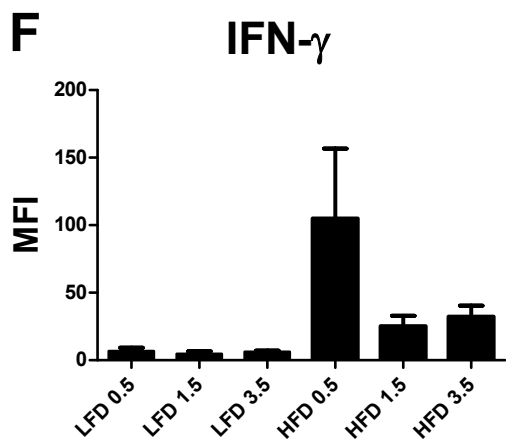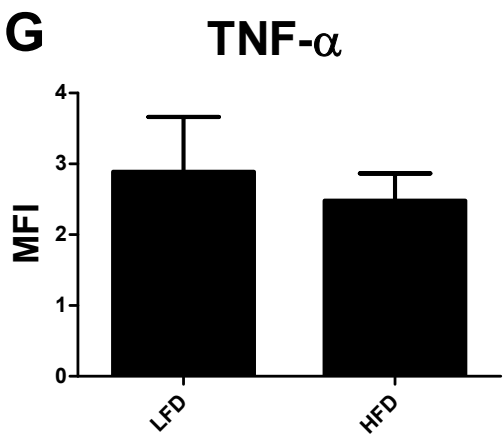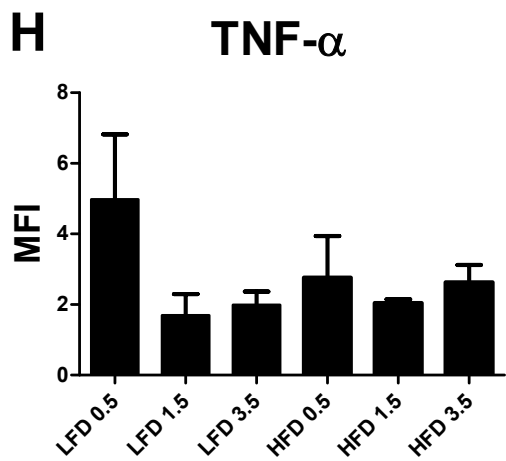

**A**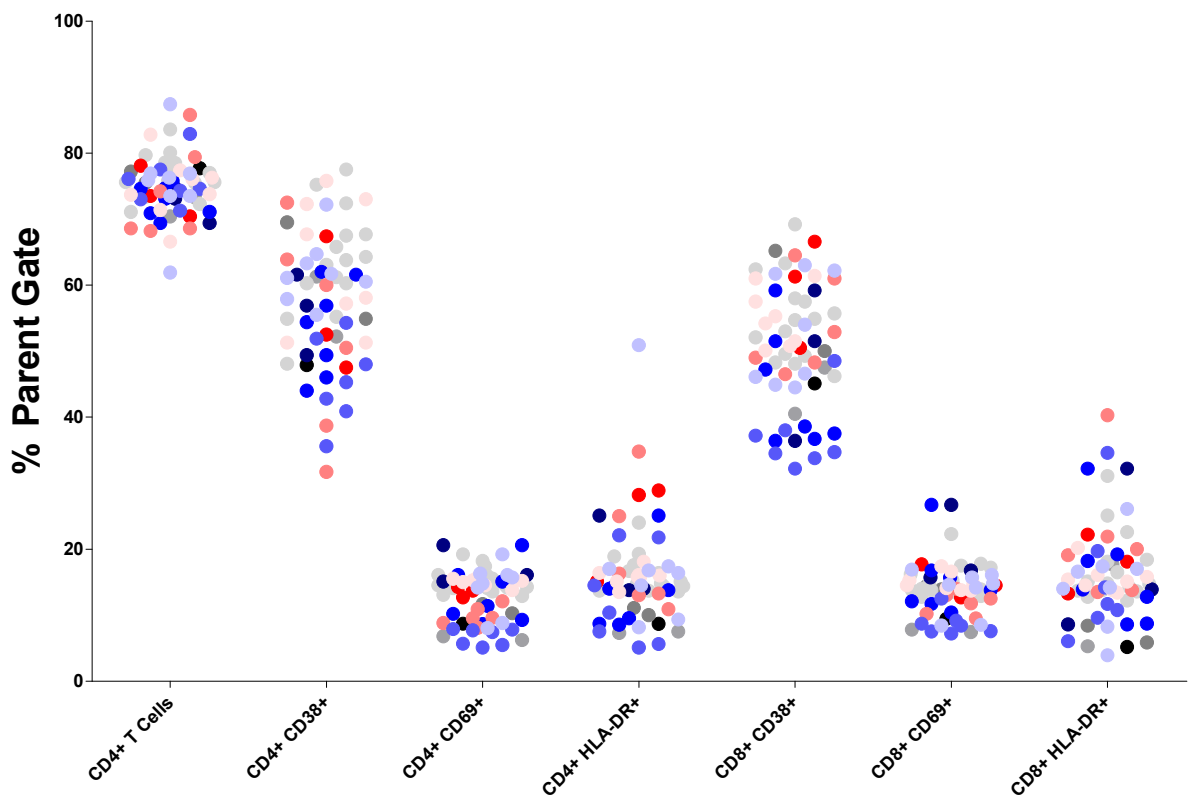**B**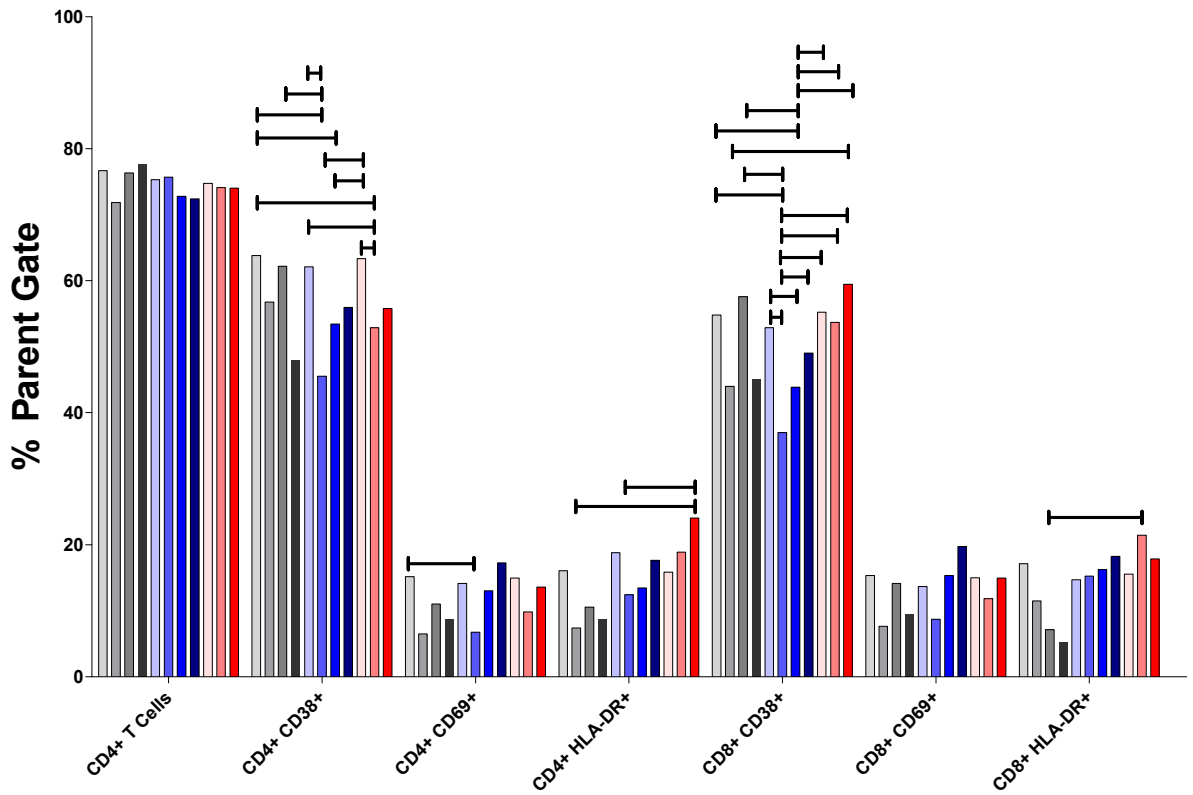

|               |              |              |
|---------------|--------------|--------------|
| ● Week 0 Chow | ● Week 0 LFD | ● Week 0 HFD |
| ● Week 3 Chow | ● Week 3 LFD | ● Week 3 HFD |
| ● Week 6 Chow | ● Week 6 LFD | ● Week 6 HFD |
| ● Week 8 Chow | ● Week 8 LFD |              |
